# Supplementary material for: Personality and brain contribute to academic achievements of medical students
Source: Frontiers journal article supplement (doi:10.3389/fnins.2022.964904), 2022-09-06
Supplement: Data_Sheet_1.pdf [file Data_Sheet_1.pdf]

## **Supplementary Materials**

### **Personality and Brain Contribute to Academic Achievements of Medical Students**

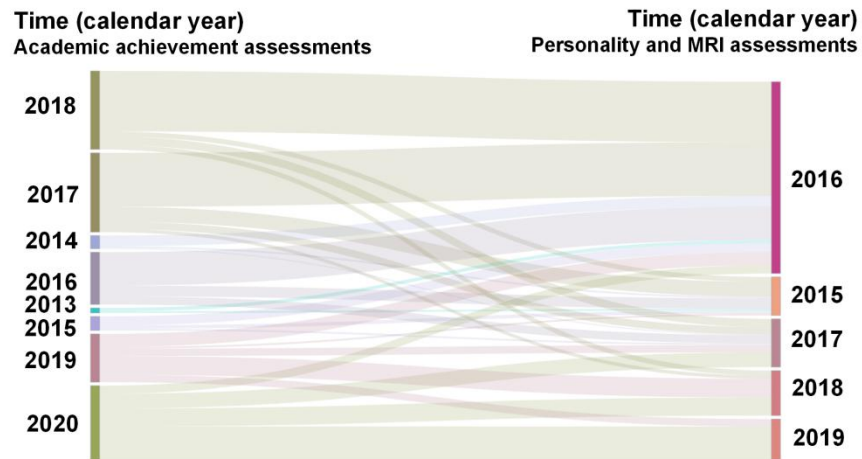

**Supplementary Figure 1. The corresponding time (calendar year) of academic achievement assessment and personality/MRI assessment for each subject.**

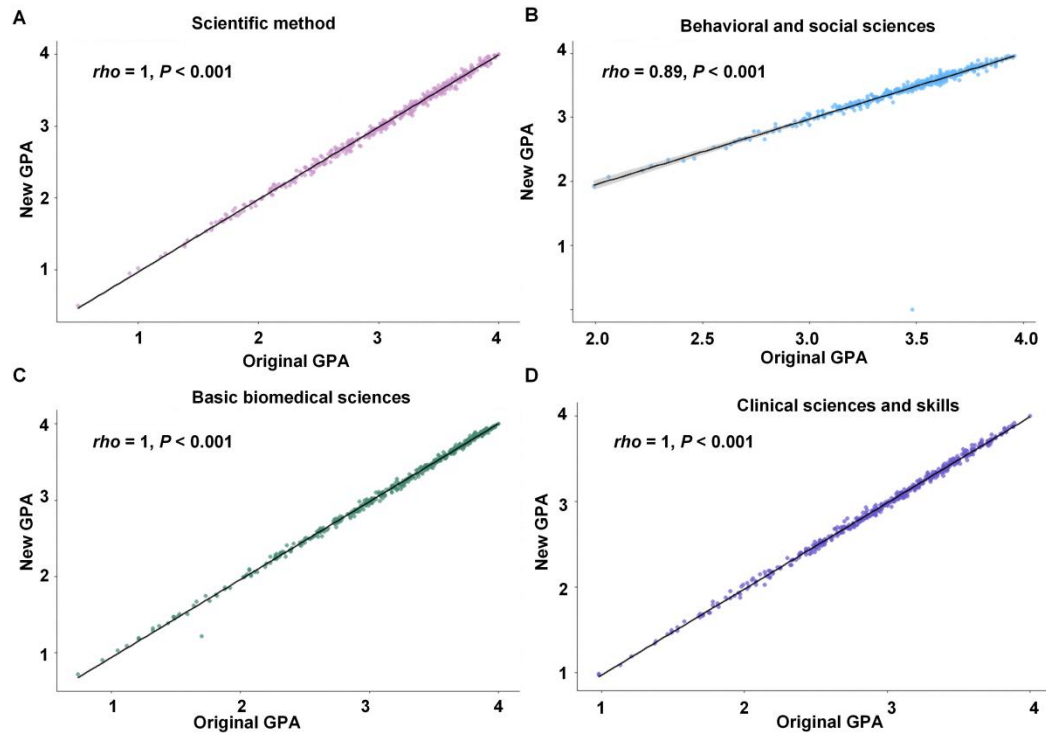

**Supplementary Figure 2. The correlation between original GPA and new GPA.**

The x-axis shows the original GPA scores and the y-axis shows the new GPA scores based on the theory of “point to point”.

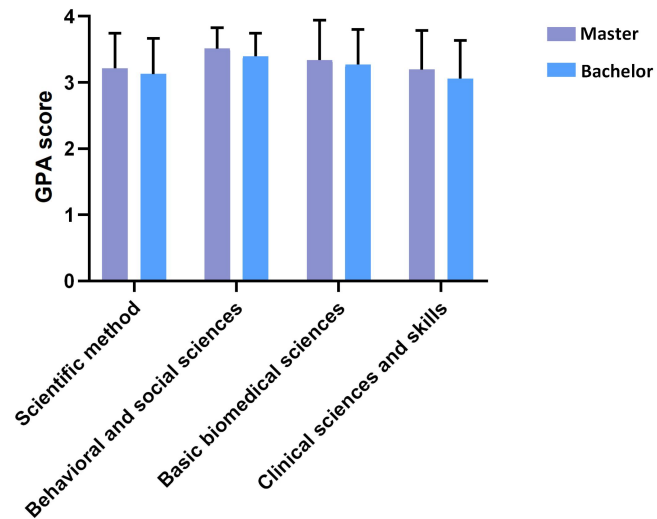

**Supplementary Figure 3. The distribution of GPA scores in four kinds of academic achievements in master and bachelor.** The purple color represents the GPA scores of the master, the blue color represents the GPA scores of the bachelor.

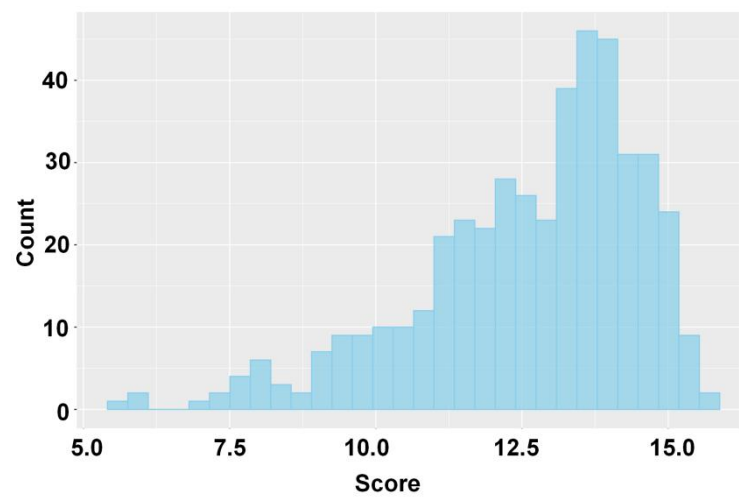

**Supplementary Figure 4. The distribution of total GPA score.** The x-axis shows the GPA scores and the y-axis shows the number of subjects.

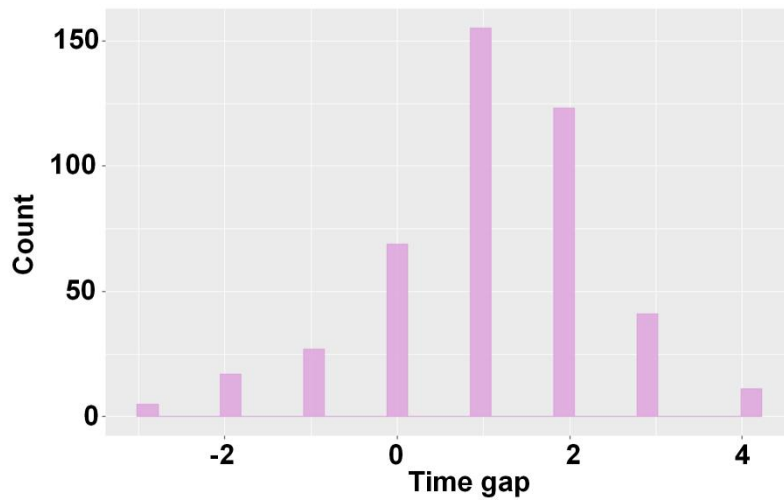

**Supplementary Figure 5. The distribution of time gap between academic achievement assessment and personality/MRI assessment.** Time gap (calendar year) was evaluated by  $\text{time}_{\text{academic assessment}} - \text{time}_{\text{MRI/personality assessment}}$ .

## Supplementary Tables

**Supplementary Table 1. Inclusion and exclusion criteria for the participants**

| Category           | Item                                                                                                                      |
|--------------------|---------------------------------------------------------------------------------------------------------------------------|
| Inclusion criteria | Age of 18-30 years                                                                                                        |
|                    | Chinese Han without other ethnic ancestors in recent three generations                                                    |
|                    | Right-handedness confirmed by the handedness questionnaire                                                                |
|                    | Relatives have participated in this study                                                                                 |
|                    | Neuropsychiatric diseases (schizophrenia, anxiety, depression, epilepsy, stroke, tumors, and multiple sclerosis, etc.)    |
|                    | Consciousness loss for more than 5 minutes                                                                                |
|                    | Brain injury or neurosurgery                                                                                              |
|                    | Major physical illnesses (heart disease, hypertension, nephritis, diabetes, malignant tumors, hereditary diseases, etc.)  |
|                    | Visible brain abnormalities on previous MRI examinations                                                                  |
|                    | Psychiatric disorders in three generation relatives                                                                       |
| Exclusion criteria | Alcohol or drug abuse or dependence                                                                                       |
|                    | The total number of cigarettes so far is more than 20                                                                     |
|                    | Currently with any medication (including contraceptives)                                                                  |
|                    | Taking drugs (antipsychotics, mood stabilizers, isoniazid, glucocorticoids, stimulants, etc.) that might affect the brain |
|                    | Using sedative hypnotics (benzodiazepines, barbiturates) within one month                                                 |
|                    | Color blindness or difficulty in color discrimination                                                                     |
|                    | Women in pregnancy or in the menstrual period on the day of the experiment                                                |
|                    | Strenuous exercise or consumption of strong tea, caffeine or alcoholic beverages on the day of the experiment             |
|                    | Without enough sleep (< 7 hours) at the night before the experiment                                                       |
|                    | Metal implants                                                                                                            |
|                    | Electronic implants (e.g., pacemakers)                                                                                    |
|                    | Severe claustrophobia                                                                                                     |

**Supplementary Table 2. Detailed degree types of subjects and academic achievements period**

| ID     | Personality and MRI assessments |                    |                       | Academic achievement assessments |                           |                       |
|--------|---------------------------------|--------------------|-----------------------|----------------------------------|---------------------------|-----------------------|
|        | Time<br>(calendar<br>year)      | Academic<br>degree | Years of<br>education | Time<br>(calendar<br>year)       | Source of score           | Years of<br>education |
| Sub001 | 2015.11                         | master             | 18                    | 2014.07                          | 5 years (2009.09-2014.07) | 17                    |
| Sub002 | 2015.10                         | master             | 17                    | 2015.07                          | 5 years (2010.09-2015.07) | 17                    |
| Sub003 | 2015.11                         | master             | 16                    | 2016.07                          | 5 years (2011.09-2016.07) | 17                    |
| Sub004 | 2015.11                         | bachelor           | 13                    | 2019.07                          | 5 years (2014.09-2019.07) | 17                    |
| Sub005 | 2015.11                         | bachelor           | 15                    | 2017.07                          | 5 years (2012.09-2017.07) | 17                    |
| Sub006 | 2015.11                         | bachelor           | 15                    | 2017.07                          | 5 years (2012.09-2017.07) | 17                    |
| Sub007 | 2015.11                         | bachelor           | 16                    | 2017.07                          | 5 years (2012.09-2017.07) | 18                    |
| Sub008 | 2015.11                         | bachelor           | 16                    | 2017.07                          | 5 years (2012.09-2017.07) | 18                    |
| Sub009 | 2015.11                         | bachelor           | 15                    | 2017.07                          | 5 years (2012.09-2017.07) | 17                    |
| Sub010 | 2015.11                         | bachelor           | 15                    | 2017.07                          | 5 years (2012.09-2017.07) | 17                    |
| Sub011 | 2015.12                         | bachelor           | 15                    | 2017.07                          | 5 years (2012.09-2017.07) | 17                    |
| Sub012 | 2015.12                         | bachelor           | 14                    | 2018.07                          | 5 years (2013.09-2018.07) | 17                    |
| Sub013 | 2015.12                         | bachelor           | 14                    | 2018.07                          | 5 years (2013.09-2018.07) | 17                    |
| Sub014 | 2015.12                         | bachelor           | 14                    | 2018.07                          | 5 years (2013.09-2018.07) | 17                    |
| Sub015 | 2015.12                         | bachelor           | 14                    | 2015.07                          | 5 years (2010.09-2015.07) | 14                    |
| Sub016 | 2015.12                         | bachelor           | 15                    | 2018.07                          | 5 years (2013.09-2018.07) | 18                    |
| Sub017 | 2015.12                         | bachelor           | 14                    | 2013.07                          | 5 years (2008.09-2013.07) | 12                    |
| Sub018 | 2015.12                         | bachelor           | 14                    | 2017.07                          | 5 years (2012.09-2017.07) | 16                    |
| Sub019 | 2015.12                         | bachelor           | 14                    | 2018.07                          | 5 years (2013.09-2018.07) | 17                    |
| Sub020 | 2015.12                         | master             | 19                    | 2014.07                          | 5 years (2009.09-2014.07) | 18                    |
| Sub021 | 2016.01                         | bachelor           | 16                    | 2016.07                          | 5 years (2011.09-2016.07) | 16                    |
| Sub022 | 2016.01                         | master             | 17                    | 2015.07                          | 5 years (2010.09-2015.07) | 16                    |
| Sub023 | 2016.01                         | master             | 19                    | 2014.07                          | 5 years (2009.09-2014.07) | 17                    |
| Sub024 | 2016.01                         | master             | 18                    | 2014.07                          | 5 years (2009.09-2014.07) | 16                    |
| Sub025 | 2016.01                         | master             | 18                    | 2014.07                          | 5 years (2009.09-2014.07) | 16                    |
| Sub026 | 2016.01                         | bachelor           | 15                    | 2017.07                          | 5 years (2012.09-2017.07) | 16                    |
| Sub027 | 2016.06                         | master             | 18                    | 2014.07                          | 5 years (2009.09-2014.07) | 16                    |
| Sub028 | 2016.01                         | bachelor           | 15                    | 2017.07                          | 5 years (2012.09-2017.07) | 16                    |
| Sub029 | 2016.01                         | bachelor           | 15                    | 2017.07                          | 5 years (2012.09-2017.07) | 16                    |
| Sub030 | 2016.01                         | master             | 21                    | 2014.07                          | 5 years (2009.09-2014.07) | 19                    |
| Sub031 | 2016.01                         | bachelor           | 17                    | 2015.07                          | 5 years (2010.09-2015.07) | 16                    |
| Sub032 | 2016.02                         | bachelor           | 17                    | 2016.07                          | 5 years (2011.09-2016.07) | 17                    |
| Sub033 | 2016.03                         | master             | 18                    | 2015.07                          | 5 years (2010.09-2015.07) | 17                    |
| Sub034 | 2016.03                         | bachelor           | 15                    | 2018.07                          | 5 years (2013.09-2018.07) | 17                    |
| Sub035 | 2016.03                         | bachelor           | 15                    | 2018.07                          | 5 years (2013.09-2018.07) | 17                    |
| Sub036 | 2016.03                         | master             | 17                    | 2015.07                          | 5 years (2010.09-2015.07) | 16                    |
| Sub037 | 2016.03                         | bachelor           | 15                    | 2018.07                          | 5 years (2013.09-2018.07) | 17                    |



|        |         |          |    |         |                           |    |
|--------|---------|----------|----|---------|---------------------------|----|
| Sub038 | 2016.03 | bachelor | 15 | 2018.07 | 5 years (2013.09-2018.07) | 17 |
| Sub039 | 2016.03 | bachelor | 16 | 2017.07 | 5 years (2012.09-2017.07) | 17 |
| Sub040 | 2016.03 | bachelor | 16 | 2017.07 | 5 years (2012.09-2017.07) | 17 |
| Sub041 | 2016.07 | bachelor | 16 | 2019.07 | 5 years (2014.09-2019.07) | 19 |
| Sub042 | 2016.03 | bachelor | 17 | 2016.07 | 5 years (2011.09-2016.07) | 17 |
| Sub043 | 2016.03 | bachelor | 15 | 2017.07 | 5 years (2012.09-2017.07) | 16 |
| Sub044 | 2016.03 | bachelor | 16 | 2016.07 | 5 years (2011.09-2016.07) | 16 |
| Sub045 | 2016.03 | bachelor | 17 | 2016.07 | 5 years (2011.09-2016.07) | 17 |
| Sub046 | 2016.04 | bachelor | 15 | 2017.07 | 5 years (2012.09-2017.07) | 16 |
| Sub047 | 2016.03 | bachelor | 16 | 2017.07 | 5 years (2012.09-2017.07) | 17 |
| Sub048 | 2016.04 | bachelor | 15 | 2017.07 | 5 years (2012.09-2017.07) | 16 |
| Sub049 | 2016.04 | bachelor | 16 | 2016.07 | 5 years (2011.09-2016.07) | 16 |
| Sub050 | 2016.04 | master   | 19 | 2015.07 | 5 years (2010.09-2015.07) | 18 |
| Sub051 | 2016.04 | bachelor | 17 | 2016.07 | 5 years (2011.09-2016.07) | 17 |
| Sub052 | 2016.04 | master   | 17 | 2014.07 | 5 years (2009.09-2014.07) | 15 |
| Sub053 | 2016.04 | master   | 17 | 2014.07 | 5 years (2009.09-2014.07) | 15 |
| Sub054 | 2016.04 | bachelor | 16 | 2017.07 | 5 years (2012.09-2017.07) | 17 |
| Sub055 | 2016.05 | bachelor | 15 | 2018.07 | 5 years (2013.09-2018.07) | 17 |
| Sub056 | 2016.05 | bachelor | 15 | 2018.07 | 5 years (2013.09-2018.07) | 17 |
| Sub057 | 2016.05 | bachelor | 17 | 2016.07 | 5 years (2011.09-2016.07) | 17 |
| Sub058 | 2016.04 | bachelor | 15 | 2018.07 | 5 years (2013.09-2018.07) | 17 |
| Sub059 | 2016.05 | bachelor | 18 | 2016.07 | 5 years (2011.09-2016.07) | 18 |
| Sub060 | 2016.05 | bachelor | 15 | 2018.07 | 5 years (2013.09-2018.07) | 17 |
| Sub061 | 2016.05 | bachelor | 15 | 2018.07 | 5 years (2013.09-2018.07) | 17 |
| Sub062 | 2016.05 | bachelor | 15 | 2018.07 | 5 years (2013.09-2018.07) | 17 |
| Sub063 | 2016.05 | bachelor | 15 | 2018.07 | 5 years (2013.09-2018.07) | 17 |
| Sub064 | 2016.05 | bachelor | 15 | 2018.07 | 5 years (2013.09-2018.07) | 17 |
| Sub065 | 2016.05 | bachelor | 15 | 2018.07 | 5 years (2013.09-2018.07) | 17 |
| Sub066 | 2016.05 | bachelor | 15 | 2018.07 | 5 years (2013.09-2018.07) | 17 |
| Sub067 | 2016.05 | bachelor | 15 | 2018.07 | 5 years (2013.09-2018.07) | 17 |
| Sub068 | 2016.05 | bachelor | 15 | 2018.07 | 5 years (2013.09-2018.07) | 17 |
| Sub069 | 2016.05 | bachelor | 15 | 2018.07 | 5 years (2013.09-2018.07) | 17 |
| Sub070 | 2016.05 | bachelor | 15 | 2018.07 | 5 years (2013.09-2018.07) | 17 |
| Sub071 | 2016.05 | bachelor | 15 | 2018.07 | 5 years (2013.09-2018.07) | 17 |
| Sub072 | 2016.05 | bachelor | 15 | 2018.07 | 5 years (2013.09-2018.07) | 17 |
| Sub073 | 2016.05 | master   | 19 | 2014.07 | 5 years (2009.09-2014.07) | 17 |
| Sub074 | 2016.06 | master   | 19 | 2014.07 | 5 years (2009.09-2014.07) | 17 |
| Sub075 | 2016.06 | master   | 18 | 2015.07 | 5 years (2010.09-2015.07) | 17 |
| Sub076 | 2016.06 | bachelor | 14 | 2019.07 | 5 years (2014.09-2019.07) | 17 |
| Sub077 | 2016.06 | bachelor | 14 | 2019.07 | 5 years (2014.09-2019.07) | 17 |
| Sub078 | 2016.06 | bachelor | 14 | 2019.07 | 5 years (2014.09-2019.07) | 17 |
| Sub079 | 2016.06 | bachelor | 16 | 2017.07 | 5 years (2012.09-2017.07) | 17 |
| Sub080 | 2016.07 | master   | 18 | 2015.07 | 5 years (2010.09-2015.07) | 17 |
| Sub081 | 2016.07 | master   | 17 | 2016.07 | 5 years (2011.09-2016.07) | 17 |

|        |         |          |    |         |                           |    |
|--------|---------|----------|----|---------|---------------------------|----|
| Sub082 | 2016.07 | bachelor | 16 | 2017.07 | 5 years (2012.09-2017.07) | 17 |
| Sub083 | 2016.07 | master   | 15 | 2018.07 | 5 years (2013.09-2018.07) | 17 |
| Sub084 | 2016.07 | bachelor | 16 | 2017.07 | 5 years (2012.09-2017.07) | 17 |
| Sub085 | 2016.07 | bachelor | 16 | 2017.07 | 5 years (2012.09-2017.07) | 17 |
| Sub086 | 2016.07 | bachelor | 17 | 2017.07 | 5 years (2012.09-2017.07) | 18 |
| Sub087 | 2016.07 | bachelor | 16 | 2017.07 | 5 years (2012.09-2017.07) | 17 |
| Sub088 | 2016.07 | bachelor | 16 | 2017.07 | 5 years (2012.09-2017.07) | 17 |
| Sub089 | 2016.08 | bachelor | 17 | 2017.07 | 5 years (2012.09-2017.07) | 18 |
| Sub090 | 2016.07 | bachelor | 16 | 2017.07 | 5 years (2012.09-2017.07) | 17 |
| Sub091 | 2016.07 | bachelor | 16 | 2017.07 | 5 years (2012.09-2017.07) | 17 |
| Sub092 | 2016.07 | bachelor | 16 | 2017.07 | 5 years (2012.09-2017.07) | 17 |
| Sub093 | 2016.07 | bachelor | 15 | 2017.07 | 5 years (2012.09-2017.07) | 16 |
| Sub094 | 2016.07 | bachelor | 17 | 2017.07 | 5 years (2012.09-2017.07) | 18 |
| Sub095 | 2016.07 | bachelor | 16 | 2017.07 | 5 years (2012.09-2017.07) | 17 |
| Sub096 | 2016.08 | bachelor | 17 | 2017.07 | 5 years (2012.09-2017.07) | 18 |
| Sub097 | 2016.08 | bachelor | 17 | 2017.07 | 5 years (2012.09-2017.07) | 18 |
| Sub098 | 2016.08 | bachelor | 16 | 2017.07 | 5 years (2012.09-2017.07) | 17 |
| Sub099 | 2016.08 | bachelor | 16 | 2017.07 | 5 years (2012.09-2017.07) | 17 |
| Sub100 | 2016.08 | bachelor | 16 | 2017.07 | 5 years (2012.09-2017.07) | 17 |
| Sub101 | 2016.08 | bachelor | 16 | 2017.07 | 5 years (2012.09-2017.07) | 17 |
| Sub102 | 2016.08 | bachelor | 16 | 2017.07 | 5 years (2012.09-2017.07) | 17 |
| Sub103 | 2016.08 | bachelor | 16 | 2017.07 | 5 years (2012.09-2017.07) | 17 |
| Sub104 | 2016.08 | master   | 17 | 2016.07 | 5 years (2011.09-2016.07) | 17 |
| Sub105 | 2016.08 | bachelor | 17 | 2017.07 | 5 years (2012.09-2017.07) | 18 |
| Sub106 | 2016.08 | bachelor | 16 | 2017.07 | 5 years (2012.09-2017.07) | 17 |
| Sub107 | 2016.08 | bachelor | 16 | 2017.07 | 5 years (2012.09-2017.07) | 17 |
| Sub108 | 2016.08 | bachelor | 13 | 2019.07 | 5 years (2014.09-2019.07) | 16 |
| Sub109 | 2016.09 | master   | 15 | 2018.07 | 5 years (2013.09-2018.07) | 17 |
| Sub110 | 2016.09 | master   | 17 | 2017.07 | 5 years (2012.09-2017.07) | 18 |
| Sub111 | 2016.10 | bachelor | 13 | 2020.07 | 5 years (2015.09-2020.07) | 17 |
| Sub112 | 2016.09 | bachelor | 15 | 2018.07 | 5 years (2013.09-2018.07) | 17 |
| Sub113 | 2016.09 | bachelor | 14 | 2018.07 | 5 years (2013.09-2018.07) | 16 |
| Sub114 | 2016.09 | bachelor | 16 | 2018.07 | 5 years (2013.09-2018.07) | 18 |
| Sub115 | 2016.09 | bachelor | 15 | 2018.07 | 5 years (2013.09-2018.07) | 17 |
| Sub116 | 2016.09 | bachelor | 16 | 2018.07 | 5 years (2013.09-2018.07) | 18 |
| Sub117 | 2016.09 | bachelor | 15 | 2018.07 | 5 years (2013.09-2018.07) | 17 |
| Sub118 | 2016.09 | bachelor | 14 | 2018.07 | 5 years (2013.09-2018.07) | 16 |
| Sub119 | 2016.09 | bachelor | 16 | 2017.07 | 5 years (2012.09-2017.07) | 17 |
| Sub120 | 2016.09 | bachelor | 16 | 2018.07 | 5 years (2013.09-2018.07) | 18 |
| Sub121 | 2016.10 | bachelor | 14 | 2019.07 | 5 years (2014.09-2019.07) | 17 |
| Sub122 | 2016.10 | bachelor | 16 | 2017.07 | 5 years (2012.09-2017.07) | 17 |
| Sub123 | 2016.10 | bachelor | 15 | 2019.07 | 5 years (2014.09-2019.07) | 18 |
| Sub124 | 2016.10 | bachelor | 14 | 2018.07 | 5 years (2013.09-2018.07) | 16 |
| Sub125 | 2016.10 | bachelor | 14 | 2019.07 | 5 years (2014.09-2019.07) | 17 |

|        |         |          |    |         |                           |    |
|--------|---------|----------|----|---------|---------------------------|----|
| Sub126 | 2016.10 | bachelor | 14 | 2018.07 | 5 years (2013.09-2018.07) | 16 |
| Sub127 | 2016.10 | bachelor | 13 | 2020.07 | 5 years (2015.09-2020.07) | 17 |
| Sub128 | 2016.10 | bachelor | 14 | 2019.07 | 5 years (2014.09-2019.07) | 17 |
| Sub129 | 2016.10 | bachelor | 13 | 2020.07 | 5 years (2015.09-2020.07) | 17 |
| Sub130 | 2016.10 | bachelor | 15 | 2018.07 | 5 years (2013.09-2018.07) | 17 |
| Sub131 | 2016.10 | bachelor | 12 | 2020.07 | 4 years (2016.09-2020.07) | 16 |
| Sub132 | 2016.10 | bachelor | 13 | 2020.07 | 5 years (2015.09-2020.07) | 17 |
| Sub133 | 2016.11 | bachelor | 15 | 2017.07 | 5 years (2012.09-2017.07) | 16 |
| Sub134 | 2016.12 | master   | 17 | 2016.07 | 5 years (2011.09-2016.07) | 17 |
| Sub135 | 2016.12 | master   | 17 | 2016.07 | 5 years (2011.09-2016.07) | 17 |
| Sub136 | 2017.01 | bachelor | 15 | 2017.07 | 5 years (2012.09-2017.07) | 15 |
| Sub137 | 2017.02 | bachelor | 14 | 2019.07 | 5 years (2014.09-2019.07) | 16 |
| Sub138 | 2017.02 | bachelor | 14 | 2019.07 | 5 years (2014.09-2019.07) | 16 |
| Sub139 | 2017.02 | master   | 19 | 2015.07 | 5 years (2010.09-2015.07) | 17 |
| Sub140 | 2017.03 | bachelor | 13 | 2020.07 | 4 years (2016.09-2020.07) | 16 |
| Sub141 | 2017.03 | bachelor | 15 | 2019.07 | 5 years (2014.09-2019.07) | 17 |
| Sub142 | 2017.04 | bachelor | 14 | 2020.07 | 5 years (2015.09-2020.07) | 17 |
| Sub143 | 2017.05 | bachelor | 13 | 2020.07 | 4 years (2016.09-2020.07) | 16 |
| Sub144 | 2017.04 | bachelor | 13 | 2020.07 | 5 years (2015.09-2020.07) | 16 |
| Sub145 | 2017.05 | bachelor | 14 | 2020.07 | 5 years (2015.09-2020.07) | 17 |
| Sub146 | 2017.05 | bachelor | 15 | 2019.07 | 5 years (2014.09-2019.07) | 17 |
| Sub147 | 2017.05 | bachelor | 17 | 2017.07 | 5 years (2012.09-2017.07) | 17 |
| Sub148 | 2017.05 | bachelor | 13 | 2020.07 | 4 years (2016.09-2020.07) | 16 |
| Sub149 | 2017.06 | bachelor | 16 | 2018.07 | 5 years (2013.09-2018.07) | 17 |
| Sub150 | 2017.06 | bachelor | 16 | 2018.07 | 5 years (2013.09-2018.07) | 17 |
| Sub151 | 2017.06 | bachelor | 13 | 2020.07 | 5 years (2015.09-2020.07) | 16 |
| Sub152 | 2017.06 | bachelor | 15 | 2019.07 | 5 years (2014.09-2019.07) | 17 |
| Sub153 | 2017.06 | bachelor | 16 | 2019.07 | 5 years (2014.09-2019.07) | 18 |
| Sub154 | 2017.06 | bachelor | 13 | 2020.07 | 4 years (2016.09-2020.07) | 16 |
| Sub155 | 2017.06 | bachelor | 14 | 2020.07 | 5 years (2015.09-2020.07) | 17 |
| Sub156 | 2017.06 | bachelor | 15 | 2019.07 | 5 years (2014.09-2019.07) | 17 |
| Sub157 | 2017.06 | bachelor | 14 | 2020.07 | 5 years (2015.09-2020.07) | 17 |
| Sub158 | 2017.06 | bachelor | 14 | 2019.07 | 5 years (2014.09-2019.07) | 16 |
| Sub159 | 2017.06 | bachelor | 15 | 2019.07 | 5 years (2014.09-2019.07) | 17 |
| Sub160 | 2017.06 | bachelor | 13 | 2020.07 | 4 years (2016.09-2020.07) | 16 |
| Sub161 | 2017.06 | bachelor | 14 | 2020.07 | 5 years (2015.09-2020.07) | 17 |
| Sub162 | 2017.06 | bachelor | 14 | 2020.07 | 5 years (2015.09-2020.07) | 17 |
| Sub163 | 2017.06 | bachelor | 15 | 2020.07 | 5 years (2015.09-2020.07) | 18 |
| Sub164 | 2017.06 | bachelor | 14 | 2020.07 | 5 years (2015.09-2020.07) | 17 |
| Sub165 | 2017.07 | bachelor | 13 | 2020.07 | 4 years (2016.09-2020.07) | 16 |
| Sub166 | 2017.07 | bachelor | 16 | 2018.07 | 5 years (2013.09-2018.07) | 17 |
| Sub167 | 2017.07 | bachelor | 17 | 2018.07 | 5 years (2013.09-2018.07) | 18 |
| Sub168 | 2017.07 | master   | 17 | 2016.07 | 5 years (2011.09-2016.07) | 16 |
| Sub169 | 2017.07 | bachelor | 16 | 2018.07 | 5 years (2013.09-2018.07) | 17 |

|        |         |          |    |         |                           |    |
|--------|---------|----------|----|---------|---------------------------|----|
| Sub170 | 2017.07 | bachelor | 16 | 2018.07 | 5 years (2013.09-2018.07) | 17 |
| Sub171 | 2017.08 | master   | 18 | 2016.07 | 5 years (2011.09-2016.07) | 17 |
| Sub172 | 2017.08 | bachelor | 17 | 2018.07 | 5 years (2013.09-2018.07) | 18 |
| Sub173 | 2017.08 | bachelor | 16 | 2018.07 | 5 years (2013.09-2018.07) | 17 |
| Sub174 | 2017.09 | master   | 17 | 2016.07 | 5 years (2011.09-2016.07) | 16 |
| Sub175 | 2017.09 | bachelor | 15 | 2020.07 | 5 years (2015.09-2020.07) | 18 |
| Sub176 | 2017.09 | master   | 18 | 2016.07 | 5 years (2011.09-2016.07) | 17 |
| Sub177 | 2017.09 | master   | 20 | 2016.07 | 5 years (2011.09-2016.07) | 19 |
| Sub178 | 2017.09 | master   | 17 | 2017.07 | 5 years (2012.09-2017.07) | 17 |
| Sub179 | 2017.09 | master   | 18 | 2016.07 | 5 years (2011.09-2016.07) | 17 |
| Sub180 | 2017.09 | master   | 18 | 2016.07 | 5 years (2011.09-2016.07) | 17 |
| Sub181 | 2017.09 | master   | 18 | 2016.07 | 5 years (2011.09-2016.07) | 17 |
| Sub182 | 2017.09 | master   | 17 | 2017.07 | 5 years (2012.09-2017.07) | 17 |
| Sub183 | 2017.09 | master   | 17 | 2017.07 | 5 years (2012.09-2017.07) | 17 |
| Sub184 | 2017.10 | doctor   | 20 | 2014.07 | 5 years (2009.09-2014.07) | 17 |
| Sub185 | 2017.10 | doctor   | 20 | 2015.07 | 5 years (2010.09-2015.07) | 18 |
| Sub186 | 2017.10 | master   | 19 | 2016.07 | 5 years (2011.09-2016.07) | 18 |
| Sub187 | 2017.10 | master   | 17 | 2016.07 | 5 years (2011.09-2016.07) | 16 |
| Sub188 | 2017.11 | master   | 17 | 2017.07 | 5 years (2012.09-2017.07) | 17 |
| Sub189 | 2017.11 | bachelor | 13 | 2020.07 | 4 years (2016.09-2020.07) | 16 |
| Sub190 | 2017.12 | bachelor | 15 | 2018.07 | 5 years (2013.09-2018.07) | 16 |
| Sub191 | 2017.12 | bachelor | 16 | 2018.07 | 5 years (2013.09-2018.07) | 17 |
| Sub192 | 2017.12 | master   | 18 | 2017.07 | 5 years (2012.09-2017.07) | 18 |
| Sub193 | 2018.01 | bachelor | 15 | 2019.07 | 5 years (2014.09-2019.07) | 16 |
| Sub194 | 2018.01 | bachelor | 15 | 2019.07 | 5 years (2014.09-2019.07) | 16 |
| Sub195 | 2018.01 | bachelor | 12 | 2020.07 | 3 years (2017.09-2020.07) | 14 |
| Sub196 | 2018.01 | bachelor | 15 | 2019.07 | 5 years (2014.09-2019.07) | 16 |
| Sub197 | 2018.01 | bachelor | 15 | 2019.07 | 5 years (2014.09-2019.07) | 16 |
| Sub198 | 2018.01 | bachelor | 15 | 2019.07 | 5 years (2014.09-2019.07) | 16 |
| Sub199 | 2018.01 | bachelor | 16 | 2019.07 | 5 years (2014.09-2019.07) | 17 |
| Sub200 | 2018.01 | bachelor | 13 | 2020.07 | 3 years (2017.09-2020.07) | 15 |
| Sub201 | 2018.01 | bachelor | 12 | 2020.07 | 3 years (2017.09-2020.07) | 14 |
| Sub202 | 2018.01 | bachelor | 14 | 2020.07 | 5 years (2015.09-2020.07) | 16 |
| Sub203 | 2018.01 | bachelor | 15 | 2019.07 | 5 years (2014.09-2019.07) | 16 |
| Sub204 | 2018.02 | bachelor | 15 | 2019.07 | 5 years (2014.09-2019.07) | 16 |
| Sub205 | 2018.03 | bachelor | 14 | 2020.07 | 4 years (2016.09-2020.07) | 16 |
| Sub206 | 2018.03 | bachelor | 16 | 2018.07 | 5 years (2013.09-2018.07) | 16 |
| Sub207 | 2018.03 | bachelor | 15 | 2018.07 | 5 years (2013.09-2018.07) | 15 |
| Sub208 | 2018.03 | bachelor | 17 | 2018.07 | 5 years (2013.09-2018.07) | 17 |
| Sub209 | 2018.03 | bachelor | 19 | 2019.07 | 5 years (2014.09-2019.07) | 20 |
| Sub210 | 2018.03 | bachelor | 19 | 2018.07 | 5 years (2013.09-2018.07) | 19 |
| Sub211 | 2018.03 | bachelor | 13 | 2020.07 | 3 years (2017.09-2020.07) | 15 |
| Sub212 | 2018.03 | bachelor | 14 | 2020.07 | 5 years (2015.09-2020.07) | 16 |
| Sub213 | 2018.03 | bachelor | 14 | 2020.07 | 5 years (2015.09-2020.07) | 16 |

|        |         |          |    |         |                           |    |
|--------|---------|----------|----|---------|---------------------------|----|
| Sub214 | 2018.03 | bachelor | 16 | 2019.07 | 5 years (2014.09-2019.07) | 17 |
| Sub215 | 2018.03 | bachelor | 15 | 2020.07 | 5 years (2015.09-2020.07) | 17 |
| Sub216 | 2018.04 | bachelor | 14 | 2020.07 | 4 years (2016.09-2020.07) | 16 |
| Sub217 | 2018.04 | bachelor | 16 | 2019.07 | 5 years (2014.09-2019.07) | 17 |
| Sub218 | 2018.04 | bachelor | 15 | 2019.07 | 5 years (2014.09-2019.07) | 16 |
| Sub219 | 2018.04 | bachelor | 15 | 2020.07 | 5 years (2015.09-2020.07) | 17 |
| Sub220 | 2018.04 | bachelor | 15 | 2020.07 | 5 years (2015.09-2020.07) | 17 |
| Sub221 | 2018.04 | bachelor | 16 | 2019.07 | 5 years (2014.09-2019.07) | 17 |
| Sub222 | 2018.04 | bachelor | 16 | 2019.07 | 5 years (2014.09-2019.07) | 17 |
| Sub223 | 2018.04 | bachelor | 16 | 2019.07 | 5 years (2014.09-2019.07) | 17 |
| Sub224 | 2018.04 | bachelor | 16 | 2019.07 | 5 years (2014.09-2019.07) | 17 |
| Sub225 | 2018.04 | bachelor | 15 | 2020.07 | 5 years (2015.09-2020.07) | 17 |
| Sub226 | 2018.04 | bachelor | 16 | 2019.07 | 5 years (2014.09-2019.07) | 17 |
| Sub227 | 2018.04 | bachelor | 15 | 2019.07 | 5 years (2014.09-2019.07) | 16 |
| Sub228 | 2018.04 | bachelor | 16 | 2019.07 | 5 years (2014.09-2019.07) | 17 |
| Sub229 | 2018.04 | bachelor | 14 | 2020.07 | 4 years (2016.09-2020.07) | 16 |
| Sub230 | 2018.04 | bachelor | 14 | 2020.07 | 4 years (2016.09-2020.07) | 16 |
| Sub231 | 2018.04 | bachelor | 14 | 2020.07 | 4 years (2016.09-2020.07) | 16 |
| Sub232 | 2018.04 | bachelor | 16 | 2019.07 | 5 years (2014.09-2019.07) | 17 |
| Sub233 | 2018.09 | master   | 18 | 2017.07 | 5 years (2012.09-2017.07) | 17 |
| Sub234 | 2018.09 | master   | 18 | 2017.07 | 5 years (2012.09-2017.07) | 17 |
| Sub235 | 2018.09 | master   | 18 | 2017.07 | 5 years (2012.09-2017.07) | 17 |
| Sub236 | 2018.09 | bachelor | 16 | 2019.07 | 5 years (2014.09-2019.07) | 17 |
| Sub237 | 2018.09 | bachelor | 16 | 2019.07 | 5 years (2014.09-2019.07) | 17 |
| Sub238 | 2018.09 | bachelor | 16 | 2019.07 | 5 years (2014.09-2019.07) | 17 |
| Sub239 | 2018.10 | master   | 18 | 2017.07 | 5 years (2012.09-2017.07) | 17 |
| Sub240 | 2018.10 | bachelor | 13 | 2020.07 | 3 years (2017.09-2020.07) | 15 |
| Sub241 | 2018.10 | bachelor | 13 | 2020.07 | 3 years (2017.09-2020.07) | 15 |
| Sub242 | 2018.10 | bachelor | 14 | 2020.07 | 3 years (2017.09-2020.07) | 16 |
| Sub243 | 2018.10 | bachelor | 14 | 2018.07 | 5 years (2013.09-2018.07) | 14 |
| Sub244 | 2019.03 | bachelor | 14 | 2020.07 | 3 years (2017.09-2020.07) | 15 |
| Sub245 | 2018.12 | bachelor | 12 | 2020.07 | 3 years (2017.09-2020.07) | 14 |
| Sub246 | 2018.12 | master   | 17 | 2018.07 | 5 years (2013.09-2018.07) | 17 |
| Sub247 | 2018.12 | bachelor | 13 | 2020.07 | 3 years (2017.09-2020.07) | 15 |
| Sub248 | 2018.12 | bachelor | 14 | 2020.07 | 3 years (2017.09-2020.07) | 16 |
| Sub249 | 2019.01 | bachelor | 14 | 2020.07 | 3 years (2017.09-2020.07) | 15 |
| Sub250 | 2019.01 | bachelor | 14 | 2020.07 | 3 years (2017.09-2020.07) | 15 |
| Sub251 | 2019.01 | bachelor | 15 | 2020.07 | 5 years (2015.09-2020.07) | 16 |
| Sub252 | 2019.01 | bachelor | 15 | 2020.07 | 5 years (2015.09-2020.07) | 16 |
| Sub253 | 2019.01 | bachelor | 13 | 2020.07 | 3 years (2017.09-2020.07) | 14 |
| Sub254 | 2019.01 | bachelor | 13 | 2020.07 | 3 years (2017.09-2020.07) | 14 |
| Sub255 | 2019.01 | bachelor | 13 | 2020.07 | 3 years (2017.09-2020.07) | 14 |
| Sub256 | 2019.01 | bachelor | 14 | 2020.07 | 4 years (2016.09-2020.07) | 15 |
| Sub257 | 2019.01 | bachelor | 14 | 2020.07 | 4 years (2016.09-2020.07) | 15 |

|        |         |          |    |         |                           |    |
|--------|---------|----------|----|---------|---------------------------|----|
| Sub258 | 2019.01 | bachelor | 16 | 2020.07 | 5 years (2015.09-2020.07) | 17 |
| Sub259 | 2019.01 | bachelor | 14 | 2020.07 | 5 years (2015.09-2020.07) | 15 |
| Sub260 | 2019.01 | bachelor | 16 | 2020.07 | 5 years (2015.09-2020.07) | 17 |
| Sub261 | 2019.01 | bachelor | 14 | 2020.07 | 4 years (2016.09-2020.07) | 15 |
| Sub262 | 2019.01 | bachelor | 14 | 2020.07 | 4 years (2016.09-2020.07) | 15 |
| Sub263 | 2019.01 | bachelor | 14 | 2020.07 | 4 years (2016.09-2020.07) | 15 |
| Sub264 | 2019.01 | bachelor | 15 | 2020.07 | 5 years (2015.09-2020.07) | 16 |
| Sub265 | 2019.01 | bachelor | 16 | 2019.07 | 5 years (2014.09-2019.07) | 16 |
| Sub266 | 2019.01 | bachelor | 16 | 2020.07 | 5 years (2015.09-2020.07) | 17 |
| Sub267 | 2019.01 | bachelor | 17 | 2019.07 | 5 years (2014.09-2019.07) | 17 |
| Sub268 | 2019.01 | bachelor | 16 | 2019.07 | 5 years (2014.09-2019.07) | 16 |
| Sub269 | 2019.01 | bachelor | 16 | 2019.07 | 5 years (2014.09-2019.07) | 16 |
| Sub270 | 2019.01 | bachelor | 13 | 2020.07 | 3 years (2017.09-2020.07) | 14 |
| Sub271 | 2019.03 | bachelor | 16 | 2020.07 | 3 years (2017.09-2020.07) | 17 |
| Sub272 | 2019.03 | bachelor | 14 | 2020.07 | 4 years (2016.09-2020.07) | 15 |
| Sub273 | 2019.03 | bachelor | 15 | 2020.07 | 5 years (2015.09-2020.07) | 16 |
| Sub274 | 2019.03 | bachelor | 13 | 2020.07 | 3 years (2017.09-2020.07) | 14 |
| Sub275 | 2019.03 | bachelor | 14 | 2020.07 | 3 years (2017.09-2020.07) | 15 |
| Sub276 | 2019.03 | bachelor | 13 | 2020.07 | 3 years (2017.09-2020.07) | 14 |
| Sub277 | 2019.03 | bachelor | 15 | 2020.07 | 4 years (2016.09-2020.07) | 16 |
| Sub278 | 2019.03 | bachelor | 14 | 2020.07 | 4 years (2016.09-2020.07) | 15 |
| Sub279 | 2019.03 | bachelor | 14 | 2020.07 | 4 years (2016.09-2020.07) | 15 |
| Sub280 | 2019.03 | bachelor | 13 | 2020.07 | 3 years (2017.09-2020.07) | 14 |
| Sub281 | 2019.03 | bachelor | 14 | 2020.07 | 4 years (2016.09-2020.07) | 15 |
| Sub282 | 2019.03 | bachelor | 16 | 2020.07 | 5 years (2015.09-2020.07) | 17 |
| Sub283 | 2019.03 | bachelor | 15 | 2020.07 | 5 years (2015.09-2020.07) | 16 |
| Sub284 | 2019.03 | bachelor | 16 | 2020.07 | 5 years (2015.09-2020.07) | 17 |
| Sub285 | 2019.03 | bachelor | 14 | 2020.07 | 3 years (2017.09-2020.07) | 15 |
| Sub286 | 2019.03 | bachelor | 13 | 2020.07 | 3 years (2017.09-2020.07) | 14 |
| Sub287 | 2019.03 | bachelor | 15 | 2020.07 | 5 years (2015.09-2020.07) | 16 |
| Sub288 | 2019.03 | bachelor | 15 | 2020.07 | 5 years (2015.09-2020.07) | 16 |
| Sub289 | 2019.03 | bachelor | 16 | 2020.07 | 5 years (2015.09-2020.07) | 17 |
| Sub290 | 2019.03 | bachelor | 17 | 2019.07 | 5 years (2014.09-2019.07) | 17 |
| Sub291 | 2019.03 | bachelor | 17 | 2019.07 | 5 years (2014.09-2019.07) | 17 |
| Sub292 | 2019.03 | bachelor | 17 | 2019.07 | 5 years (2014.09-2019.07) | 17 |
| Sub293 | 2019.03 | bachelor | 17 | 2019.07 | 5 years (2014.09-2019.07) | 17 |
| Sub294 | 2019.03 | bachelor | 13 | 2020.07 | 3 years (2017.09-2020.07) | 14 |
| Sub295 | 2019.03 | bachelor | 15 | 2019.07 | 5 years (2014.09-2019.07) | 15 |
| Sub296 | 2019.03 | bachelor | 14 | 2020.07 | 4 years (2016.09-2020.07) | 15 |
| Sub297 | 2019.03 | bachelor | 15 | 2020.07 | 4 years (2016.09-2020.07) | 16 |
| Sub298 | 2019.03 | bachelor | 14 | 2020.07 | 4 years (2016.09-2020.07) | 15 |
| Sub299 | 2019.03 | bachelor | 15 | 2020.07 | 4 years (2016.09-2020.07) | 16 |
| Sub300 | 2015.11 | bachelor | 15 | 2017.07 | 5 years (2012.09-2017.07) | 17 |
| Sub301 | 2015.11 | bachelor | 16 | 2016.07 | 5 years (2011.09-2016.07) | 17 |

|        |         |          |    |         |                           |    |
|--------|---------|----------|----|---------|---------------------------|----|
| Sub302 | 2015.11 | bachelor | 16 | 2016.07 | 5 years (2011.09-2016.07) | 17 |
| Sub303 | 2015.11 | bachelor | 15 | 2017.07 | 5 years (2012.09-2017.07) | 17 |
| Sub304 | 2015.11 | bachelor | 16 | 2016.07 | 5 years (2011.09-2016.07) | 17 |
| Sub305 | 2015.11 | bachelor | 16 | 2016.07 | 5 years (2011.09-2016.07) | 17 |
| Sub306 | 2015.11 | bachelor | 16 | 2016.07 | 5 years (2011.09-2016.07) | 17 |
| Sub307 | 2015.11 | bachelor | 16 | 2016.07 | 5 years (2011.09-2016.07) | 17 |
| Sub308 | 2015.11 | bachelor | 17 | 2017.07 | 5 years (2012.09-2017.07) | 19 |
| Sub309 | 2015.11 | bachelor | 17 | 2016.07 | 5 years (2011.09-2016.07) | 18 |
| Sub310 | 2015.11 | bachelor | 17 | 2015.07 | 5 years (2010.09-2015.07) | 17 |
| Sub311 | 2015.11 | bachelor | 15 | 2017.07 | 5 years (2012.09-2017.07) | 17 |
| Sub312 | 2015.11 | bachelor | 16 | 2016.07 | 5 years (2011.09-2016.07) | 17 |
| Sub313 | 2015.11 | bachelor | 14 | 2017.07 | 5 years (2012.09-2017.07) | 16 |
| Sub314 | 2015.11 | bachelor | 15 | 2019.07 | 5 years (2014.09-2019.07) | 18 |
| Sub315 | 2015.12 | bachelor | 15 | 2017.07 | 5 years (2012.09-2017.07) | 17 |
| Sub316 | 2015.12 | bachelor | 17 | 2017.07 | 5 years (2012.09-2017.07) | 19 |
| Sub317 | 2015.12 | master   | 19 | 2013.07 | 5 years (2008.09-2013.07) | 17 |
| Sub318 | 2015.12 | bachelor | 18 | 2016.07 | 5 years (2011.09-2016.07) | 19 |
| Sub319 | 2015.12 | bachelor | 15 | 2017.07 | 5 years (2012.09-2017.07) | 17 |
| Sub320 | 2015.12 | bachelor | 15 | 2017.07 | 5 years (2012.09-2017.07) | 17 |
| Sub321 | 2015.12 | bachelor | 15 | 2018.07 | 5 years (2013.09-2018.07) | 18 |
| Sub322 | 2015.12 | bachelor | 17 | 2016.07 | 5 years (2011.09-2016.07) | 18 |
| Sub323 | 2015.12 | bachelor | 17 | 2016.07 | 5 years (2011.09-2016.07) | 18 |
| Sub324 | 2015.12 | bachelor | 17 | 2016.07 | 5 years (2011.09-2016.07) | 18 |
| Sub325 | 2015.12 | master   | 17 | 2015.07 | 5 years (2010.09-2015.07) | 17 |
| Sub326 | 2015.12 | bachelor | 14 | 2017.07 | 5 years (2012.09-2017.07) | 16 |
| Sub327 | 2016.01 | master   | 19 | 2013.07 | 5 years (2008.09-2013.07) | 16 |
| Sub328 | 2016.01 | bachelor | 16 | 2017.07 | 5 years (2012.09-2017.07) | 17 |
| Sub329 | 2016.01 | master   | 17 | 2013.07 | 5 years (2008.09-2013.07) | 14 |
| Sub330 | 2016.01 | bachelor | 14 | 2017.07 | 5 years (2012.09-2017.07) | 15 |
| Sub331 | 2016.02 | bachelor | 16 | 2016.07 | 5 years (2011.09-2016.07) | 16 |
| Sub332 | 2016.03 | bachelor | 14 | 2018.07 | 5 years (2013.09-2018.07) | 16 |
| Sub333 | 2016.03 | bachelor | 14 | 2018.07 | 5 years (2013.09-2018.07) | 16 |
| Sub334 | 2016.03 | bachelor | 19 | 2016.07 | 5 years (2011.09-2016.07) | 19 |
| Sub335 | 2016.03 | master   | 14 | 2018.07 | 5 years (2013.09-2018.07) | 16 |
| Sub336 | 2016.03 | bachelor | 16 | 2018.07 | 5 years (2013.09-2018.07) | 18 |
| Sub337 | 2016.03 | master   | 19 | 2014.07 | 5 years (2009.09-2014.07) | 17 |
| Sub338 | 2016.03 | bachelor | 14 | 2018.07 | 5 years (2013.09-2018.07) | 16 |
| Sub339 | 2016.03 | bachelor | 15 | 2017.07 | 5 years (2012.09-2017.07) | 16 |
| Sub340 | 2016.03 | bachelor | 16 | 2017.07 | 5 years (2012.09-2017.07) | 17 |
| Sub341 | 2016.03 | bachelor | 16 | 2017.07 | 5 years (2012.09-2017.07) | 17 |
| Sub342 | 2016.04 | bachelor | 15 | 2017.07 | 5 years (2012.09-2017.07) | 16 |
| Sub343 | 2016.04 | bachelor | 15 | 2017.07 | 5 years (2012.09-2017.07) | 16 |
| Sub344 | 2016.04 | master   | 19 | 2015.07 | 5 years (2010.09-2015.07) | 18 |
| Sub345 | 2016.04 | bachelor | 16 | 2016.07 | 5 years (2011.09-2016.07) | 16 |

|        |         |          |    |         |                           |    |
|--------|---------|----------|----|---------|---------------------------|----|
| Sub346 | 2016.04 | bachelor | 15 | 2017.07 | 5 years (2012.09-2017.07) | 16 |
| Sub347 | 2016.04 | bachelor | 15 | 2018.07 | 5 years (2013.09-2018.07) | 17 |
| Sub348 | 2016.04 | master   | 15 | 2016.07 | 5 years (2011.09-2016.07) | 15 |
| Sub349 | 2016.04 | bachelor | 17 | 2016.07 | 5 years (2011.09-2016.07) | 17 |
| Sub350 | 2016.04 | bachelor | 17 | 2016.07 | 5 years (2011.09-2016.07) | 17 |
| Sub351 | 2016.04 | bachelor | 16 | 2016.07 | 5 years (2011.09-2016.07) | 16 |
| Sub352 | 2016.04 | bachelor | 16 | 2017.07 | 5 years (2012.09-2017.07) | 17 |
| Sub353 | 2016.04 | bachelor | 15 | 2017.07 | 5 years (2012.09-2017.07) | 16 |
| Sub354 | 2016.04 | bachelor | 15 | 2017.07 | 5 years (2012.09-2017.07) | 16 |
| Sub355 | 2016.04 | bachelor | 16 | 2017.07 | 5 years (2012.09-2017.07) | 17 |
| Sub356 | 2016.04 | bachelor | 14 | 2018.07 | 5 years (2013.09-2018.07) | 16 |
| Sub357 | 2016.04 | bachelor | 15 | 2018.07 | 5 years (2013.09-2018.07) | 17 |
| Sub358 | 2016.04 | bachelor | 15 | 2018.07 | 5 years (2013.09-2018.07) | 17 |
| Sub359 | 2016.04 | bachelor | 15 | 2018.07 | 5 years (2013.09-2018.07) | 17 |
| Sub360 | 2016.04 | bachelor | 15 | 2018.07 | 5 years (2013.09-2018.07) | 17 |
| Sub361 | 2016.04 | bachelor | 15 | 2018.07 | 5 years (2013.09-2018.07) | 17 |
| Sub362 | 2016.04 | bachelor | 15 | 2018.07 | 5 years (2013.09-2018.07) | 17 |
| Sub363 | 2016.05 | bachelor | 15 | 2018.07 | 5 years (2013.09-2018.07) | 17 |
| Sub364 | 2016.05 | bachelor | 16 | 2018.07 | 5 years (2013.09-2018.07) | 18 |
| Sub365 | 2016.05 | bachelor | 14 | 2018.07 | 5 years (2013.09-2018.07) | 16 |
| Sub366 | 2016.05 | bachelor | 17 | 2018.07 | 5 years (2013.09-2018.07) | 19 |
| Sub367 | 2016.05 | bachelor | 17 | 2016.07 | 5 years (2011.09-2016.07) | 17 |
| Sub368 | 2016.05 | bachelor | 14 | 2018.07 | 5 years (2013.09-2018.07) | 16 |
| Sub369 | 2016.05 | bachelor | 16 | 2016.07 | 5 years (2011.09-2016.07) | 16 |
| Sub370 | 2016.05 | bachelor | 16 | 2017.07 | 5 years (2012.09-2017.07) | 17 |
| Sub371 | 2016.05 | bachelor | 14 | 2018.07 | 5 years (2013.09-2018.07) | 16 |
| Sub372 | 2016.05 | bachelor | 15 | 2018.07 | 5 years (2013.09-2018.07) | 17 |
| Sub373 | 2016.05 | bachelor | 15 | 2018.07 | 5 years (2013.09-2018.07) | 17 |
| Sub374 | 2016.05 | bachelor | 15 | 2018.07 | 5 years (2013.09-2018.07) | 17 |
| Sub375 | 2016.05 | bachelor | 15 | 2017.07 | 5 years (2012.09-2017.07) | 16 |
| Sub376 | 2016.05 | master   | 19 | 2014.07 | 5 years (2009.09-2014.07) | 17 |
| Sub377 | 2016.11 | master   | 17 | 2016.07 | 5 years (2011.09-2016.07) | 17 |
| Sub378 | 2016.05 | bachelor | 14 | 2018.07 | 5 years (2013.09-2018.07) | 16 |
| Sub379 | 2016.06 | bachelor | 15 | 2018.07 | 5 years (2013.09-2018.07) | 17 |
| Sub380 | 2016.07 | bachelor | 15 | 2018.07 | 5 years (2013.09-2018.07) | 17 |
| Sub381 | 2016.07 | master   | 18 | 2015.07 | 5 years (2010.09-2015.07) | 17 |
| Sub382 | 2016.07 | bachelor | 17 | 2016.07 | 5 years (2011.09-2016.07) | 17 |
| Sub383 | 2016.07 | master   | 19 | 2014.07 | 5 years (2009.09-2014.07) | 17 |
| Sub384 | 2016.07 | bachelor | 16 | 2017.07 | 5 years (2012.09-2017.07) | 17 |
| Sub385 | 2016.07 | bachelor | 17 | 2017.07 | 5 years (2012.09-2017.07) | 18 |
| Sub386 | 2016.07 | bachelor | 17 | 2017.07 | 5 years (2012.09-2017.07) | 18 |
| Sub387 | 2016.07 | bachelor | 17 | 2017.07 | 5 years (2012.09-2017.07) | 18 |
| Sub388 | 2016.07 | bachelor | 16 | 2017.07 | 5 years (2012.09-2017.07) | 17 |
| Sub389 | 2016.07 | bachelor | 16 | 2017.07 | 5 years (2012.09-2017.07) | 17 |



|        |         |          |    |         |                           |    |
|--------|---------|----------|----|---------|---------------------------|----|
| Sub390 | 2016.07 | master   | 19 | 2013.07 | 5 years (2008.09-2013.07) | 16 |
| Sub391 | 2016.08 | bachelor | 15 | 2017.07 | 5 years (2012.09-2017.07) | 16 |
| Sub392 | 2016.08 | master   | 17 | 2016.07 | 5 years (2011.09-2016.07) | 17 |
| Sub393 | 2016.08 | master   | 17 | 2015.07 | 5 years (2010.09-2015.07) | 16 |
| Sub394 | 2016.09 | bachelor | 17 | 2019.07 | 5 years (2014.09-2019.07) | 20 |
| Sub395 | 2016.09 | bachelor | 16 | 2017.07 | 5 years (2012.09-2017.07) | 17 |
| Sub396 | 2016.09 | bachelor | 17 | 2017.07 | 5 years (2012.09-2017.07) | 18 |
| Sub397 | 2016.09 | master   | 17 | 2016.07 | 5 years (2011.09-2016.07) | 17 |
| Sub398 | 2016.09 | bachelor | 15 | 2018.07 | 5 years (2013.09-2018.07) | 17 |
| Sub399 | 2016.09 | bachelor | 16 | 2018.07 | 5 years (2013.09-2018.07) | 18 |
| Sub400 | 2016.09 | bachelor | 14 | 2019.07 | 5 years (2014.09-2019.07) | 17 |
| Sub401 | 2016.09 | bachelor | 16 | 2017.07 | 5 years (2012.09-2017.07) | 17 |
| Sub402 | 2016.09 | bachelor | 14 | 2019.07 | 5 years (2014.09-2019.07) | 17 |
| Sub403 | 2016.09 | bachelor | 15 | 2019.07 | 5 years (2014.09-2019.07) | 18 |
| Sub404 | 2016.10 | bachelor | 13 | 2020.07 | 5 years (2015.09-2020.07) | 17 |
| Sub405 | 2016.10 | bachelor | 13 | 2020.07 | 5 years (2015.09-2020.07) | 17 |
| Sub406 | 2016.10 | bachelor | 13 | 2020.07 | 5 years (2015.09-2020.07) | 17 |
| Sub407 | 2016.10 | master   | 16 | 2015.07 | 5 years (2010.09-2015.07) | 15 |
| Sub408 | 2016.11 | master   | 20 | 2016.07 | 5 years (2011.09-2016.07) | 20 |
| Sub409 | 2016.11 | master   | 17 | 2016.07 | 5 years (2011.09-2016.07) | 17 |
| Sub410 | 2016.11 | bachelor | 17 | 2017.07 | 5 years (2012.09-2017.07) | 18 |
| Sub411 | 2016.11 | bachelor | 17 | 2018.07 | 5 years (2013.09-2018.07) | 19 |
| Sub412 | 2016.12 | master   | 18 | 2016.07 | 5 years (2011.09-2016.07) | 18 |
| Sub413 | 2016.12 | bachelor | 12 | 2020.07 | 4 years (2016.09-2020.07) | 16 |
| Sub414 | 2016.12 | master   | 17 | 2016.07 | 5 years (2011.09-2016.07) | 17 |
| Sub415 | 2016.12 | bachelor | 14 | 2020.07 | 5 years (2015.09-2020.07) | 18 |
| Sub416 | 2016.12 | bachelor | 16 | 2017.07 | 5 years (2012.09-2017.07) | 17 |
| Sub417 | 2016.12 | bachelor | 16 | 2017.07 | 5 years (2012.09-2017.07) | 17 |
| Sub418 | 2016.12 | master   | 17 | 2016.07 | 5 years (2011.09-2016.07) | 17 |
| Sub419 | 2016.04 | bachelor | 15 | 2018.07 | 5 years (2013.09-2018.07) | 17 |
| Sub420 | 2016.04 | bachelor | 15 | 2018.07 | 5 years (2013.09-2018.07) | 17 |
| Sub421 | 2016.04 | bachelor | 14 | 2018.07 | 5 years (2013.09-2018.07) | 16 |
| Sub422 | 2016.04 | bachelor | 15 | 2018.07 | 5 years (2013.09-2018.07) | 17 |
| Sub423 | 2016.03 | master   | 19 | 2014.07 | 5 years (2009.09-2014.07) | 17 |
| Sub424 | 2016.04 | bachelor | 17 | 2016.07 | 5 years (2011.09-2016.07) | 17 |
| Sub425 | 2016.05 | bachelor | 15 | 2018.07 | 5 years (2013.09-2018.07) | 17 |
| Sub426 | 2016.04 | bachelor | 15 | 2018.07 | 5 years (2013.09-2018.07) | 17 |
| Sub427 | 2016.05 | bachelor | 13 | 2019.07 | 5 years (2014.09-2019.07) | 16 |
| Sub428 | 2016.05 | bachelor | 14 | 2019.07 | 5 years (2014.09-2019.07) | 17 |
| Sub429 | 2016.05 | bachelor | 16 | 2016.07 | 5 years (2011.09-2016.07) | 16 |
| Sub430 | 2016.04 | bachelor | 16 | 2016.07 | 5 years (2011.09-2016.07) | 16 |
| Sub431 | 2016.04 | bachelor | 17 | 2016.07 | 5 years (2011.09-2016.07) | 17 |
| Sub432 | 2016.04 | bachelor | 18 | 2016.07 | 5 years (2011.09-2016.07) | 18 |
| Sub433 | 2016.05 | bachelor | 17 | 2016.07 | 5 years (2011.09-2016.07) | 17 |

|        |         |          |    |         |                           |    |
|--------|---------|----------|----|---------|---------------------------|----|
| Sub434 | 2016.05 | bachelor | 17 | 2016.07 | 5 years (2011.09-2016.07) | 17 |
| Sub435 | 2016.06 | bachelor | 15 | 2018.07 | 5 years (2013.09-2018.07) | 17 |
| Sub436 | 2016.06 | bachelor | 15 | 2018.07 | 5 years (2013.09-2018.07) | 17 |
| Sub437 | 2016.06 | bachelor | 14 | 2018.07 | 5 years (2013.09-2018.07) | 16 |
| Sub438 | 2016.06 | bachelor | 15 | 2018.07 | 5 years (2013.09-2018.07) | 17 |
| Sub439 | 2016.06 | bachelor | 17 | 2016.07 | 5 years (2011.09-2016.07) | 17 |
| Sub440 | 2016.07 | bachelor | 17 | 2016.07 | 5 years (2011.09-2016.07) | 17 |
| Sub441 | 2016.07 | bachelor | 17 | 2016.07 | 5 years (2011.09-2016.07) | 17 |
| Sub442 | 2016.10 | bachelor | 14 | 2019.07 | 5 years (2014.09-2019.07) | 17 |
| Sub443 | 2016.06 | bachelor | 15 | 2018.07 | 5 years (2013.09-2018.07) | 17 |
| Sub444 | 2016.06 | bachelor | 16 | 2018.07 | 5 years (2013.09-2018.07) | 18 |
| Sub445 | 2016.11 | bachelor | 15 | 2018.07 | 5 years (2013.09-2018.07) | 17 |
| Sub446 | 2016.10 | master   | 18 | 2013.07 | 5 years (2008.09-2013.07) | 15 |
| Sub447 | 2017.04 | bachelor | 16 | 2017.07 | 5 years (2012.09-2017.07) | 16 |
| Sub448 | 2017.04 | bachelor | 16 | 2017.07 | 5 years (2012.09-2017.07) | 16 |

**Supplementary Table 3. Courses classifications and the number of participants**

| Classifications                        | Courses                                           | Participants |
|----------------------------------------|---------------------------------------------------|--------------|
| <i>Scientific Method</i>               |                                                   |              |
|                                        | Advanced Mathematics                              | 448          |
|                                        | Basic Chemistry                                   | 337          |
|                                        | Computer Basics                                   | 422          |
|                                        | Linear Algebra and Probability Theory             | 336          |
|                                        | Organic Chemistry                                 | 447          |
|                                        | Physics                                           | 446          |
| <i>Behavioural and Social Sciences</i> |                                                   |              |
|                                        | Behavioral Medicine                               | 273          |
|                                        | Doctor-Patient Communication                      | 275          |
|                                        | Early Patient Contact Clinical Practice Training  | 331          |
|                                        | Epidemiology                                      | 324          |
|                                        | History of Medicine and Introduction to Medicine  | 323          |
|                                        | Ideological and Moral Cultivation and Legal Basis | 448          |
|                                        | Medical Ethics                                    | 431          |
|                                        | Medical Psychology                                | 341          |
|                                        | Medical Statistics                                | 448          |
|                                        | Preventive Medicine                               | 307          |
|                                        | Social Medicine                                   | 276          |
| <i>Basic Biomedical Sciences</i>       |                                                   |              |
|                                        | Biochemistry                                      | 448          |
|                                        | Cell Biology                                      | 446          |
|                                        | Functional Experiment                             | 324          |
|                                        | Genetics                                          | 322          |
|                                        | Histology and Embryology                          | 447          |
|                                        | Immunology                                        | 448          |
|                                        | Integrated Curriculum of Basic Medicine           | 249          |
|                                        | Microbiology                                      | 448          |

|                                            |                                            |     |
|--------------------------------------------|--------------------------------------------|-----|
|                                            | Molecular Biology                          | 142 |
|                                            | Parasitology                               | 447 |
|                                            | Pathology                                  | 369 |
|                                            | Pathophysiology                            | 448 |
|                                            | Pharmacology                               | 448 |
|                                            | Physiology                                 | 448 |
|                                            | Regional Anatomy                           | 344 |
|                                            | Sectional Anatomy                          | 234 |
|                                            | Systematic Anatomy                         | 448 |
| <b><i>Clinical Sciences and Skills</i></b> |                                            |     |
|                                            | Clinical Skills Science                    | 291 |
|                                            | Dermatovenereology                         | 307 |
|                                            | Diagnostics                                | 448 |
|                                            | Emergency Medicine                         | 276 |
|                                            | Evidence-Based Medicine                    | 256 |
|                                            | Forensic Medicine                          | 184 |
|                                            | General Practice                           | 256 |
|                                            | Geriatrics                                 | 304 |
|                                            | Gynaecology and Obstetrics                 | 423 |
|                                            | Infectious Diseases                        | 276 |
|                                            | Integrated Curriculum of Clinical Medicine | 379 |
|                                            | Internal Medicine                          | 448 |
|                                            | Medical Imaging                            | 440 |
|                                            | Neurology                                  | 422 |
|                                            | Oncology and Radiotherapy                  | 298 |
|                                            | Operative Surgery                          | 447 |
|                                            | Ophthalmology                              | 422 |
|                                            | Otorhinolaryngology                        | 423 |
|                                            | Pediatrics                                 | 448 |
|                                            | Psychiatry                                 | 307 |

---

|                               |     |
|-------------------------------|-----|
| Rehabilitation Medicine       | 178 |
| Stomatology                   | 376 |
| Surgery (with Anesthesiology) | 448 |
| Traditional Chinese Medicine  | 307 |

---

**Supplementary Table 4. The Academic Grading System of Tianjin Medical****University**

| Scale (Hundred-mark system) | US Grade | Converted Points |
|-----------------------------|----------|------------------|
| 90.0 - 100.0                | A        | 4.0              |
| 85.0 - 89.9                 | A-       | 3.7              |
| 82.0 - 84.9                 | B+       | 3.3              |
| 78.0 - 81.9                 | B        | 3.0              |
| 75.0 - 77.9                 | B-       | 2.7              |
| 72.0 - 74.9                 | C+       | 2.3              |
| 69.0 - 71.9                 | C        | 2.0              |
| 65.0 - 68.9                 | C-       | 1.7              |
| 61.0 - 64.9                 | D+       | 1.3              |
| 60.0 - 60.9                 | D        | 1.0              |
| 0.0 - 59.9                  | F        | 0.0              |

**Supplementary Table 5. Personality items retained in the present study.**

| Scale                                                                | Items                  | Assessment content and scientific significance                                                                                                                          | Types of Variables   |
|----------------------------------------------------------------------|------------------------|-------------------------------------------------------------------------------------------------------------------------------------------------------------------------|----------------------|
| <b>Tridimensional Personality Questionnaire (TPQ)</b>                | Novelty seeking        | Novelty seeking is referred to the exploratory excitability in response to novel stimuli, which is also characterized by extravagance, disorderliness, and impulsivity. | Continuous Variables |
|                                                                      | Harm avoidance         | Harm avoidance is referred to behavioral inhibition in response to dangerous or abhorrent stimuli.                                                                      | Continuous Variables |
|                                                                      | Reward dependence      | Reward dependence is referred to the tendency to respond particularly to signals of social reward.                                                                      | Continuous Variables |
|                                                                      | Agreeableness          | Agreeableness represents how you tend to behave in relationships with others, which is characterized by altruistic, warm, friendly, sympathetic and trustworthy.        | Continuous Variables |
| <b>Neuroticism Extraversion Openness (NEO) Personality Inventory</b> | Conscientiousness      | Conscientiousness denotes self-discipline, competence and achievement striving. A higher score represents well-organized, efficient and hard-working.                   | Continuous Variables |
|                                                                      | Extraversion           | Extraversion comprises outgoing, which is referred to how you interact with other people and the extent of seeking stimulation from others.                             | Continuous Variables |
|                                                                      | Neuroticism            | Neuroticism referred to the extent of sensitivity and nervous, which is characterized by anxiety, depression and proneness to experience negative affect                | Continuous Variables |
|                                                                      | Openness to Experience | Openness is referred to fantasy and aesthetics, a high openness score denotes creativity and invention.                                                                 | Continuous Variables |

**Supplementary Table 6. The academic grading system based on theory of “point to point”**

| Converted grade point | Scale                      |
|-----------------------|----------------------------|
| 0                     | score $\leq$ 59            |
| (score/10)-5          | 60 $\leq$ score $\leq$ 89  |
| 4                     | 90 $\leq$ score $\leq$ 100 |



**Supplementary Table 7. The *rho* values derived from correlation analysis among academic achievements**

|                                | Scientific<br>method | Behavioral<br>and social<br>sciences | Basic<br>biomedical<br>sciences | Clinical<br>sciences<br>and skills |
|--------------------------------|----------------------|--------------------------------------|---------------------------------|------------------------------------|
| Scientific method              | -                    | 0.51                                 | 0.70                            | 0.55                               |
| Behavioral and social sciences | -                    | -                                    | 0.61                            | 0.59                               |
| Basic biomedical sciences      | -                    | -                                    | -                               | 0.76                               |
| Clinical sciences and skills   | -                    | -                                    | -                               | -                                  |

**Supplementary Table 8. Correlations between TPQ, NEO and the total academic achievements**

|                                | <i>P</i>        | <i>β</i>     |
|--------------------------------|-----------------|--------------|
| <b>NS (TPQ)</b>                | <b>9.71E-05</b> | <b>-3.93</b> |
| HA (TPQ)                       | 6.52E-01        | -0.45        |
| RD(TPQ)                        | 1.27E-01        | 1.53         |
| Agreeableness (NEO)            | 2.11E-01        | 1.25         |
| <b>Conscientiousness (NEO)</b> | <b>1.37E-04</b> | <b>3.86</b>  |
| Extraversion (NEO)             | 2.82E-01        | 1.08         |
| Neuroticism (NEO)              | 5.01E-01        | 0.67         |
| Openness (NEO)                 | 1.40E-01        | -1.48        |

*Notes: The  $\beta$  and P values were obtained from the linear regression estimate, and the bold represented the significant correlations. Abbreviations: HA = Harm Avoidance; NS = Novelty Seeking; RD = Reward Dependence.*

**Supplementary Table 9. Correlations between TPQ and academic achievements after time gap regression**

|    | Scientific Method |              | Behavioural and Social Sciences |              | Basic Biomedical Sciences |              | Clinical Sciences and Skills |              |
|----|-------------------|--------------|---------------------------------|--------------|---------------------------|--------------|------------------------------|--------------|
|    | <i>P</i>          | $\beta$      | <i>P</i>                        | $\beta$      | <i>P</i>                  | $\beta$      | <i>P</i>                     | $\beta$      |
| NS | <b>4.58E-04</b>   | <b>-3.53</b> | <b>1.43E-05</b>                 | <b>-4.39</b> | <b>3.56E-04</b>           | <b>-3.60</b> | <b>9.53E-03</b>              | <b>-2.60</b> |
| HA | 6.34E-01          | -0.48        | 2.07E-01                        | -1.26        | 9.54E-01                  | 0.06         | 8.20E-01                     | -0.23        |
| RD | 1.21E-01          | 1.55         | 4.25E-01                        | 0.80         | 2.31E-01                  | 1.20         | 1.59E-01                     | 1.41         |

*Notes: The  $\beta$  and *P* values were obtained from the linear regression estimate, and the bold represented the significant correlations. Abbreviations: HA = Harm Avoidance; NS = Novelty Seeking; RD = Reward Dependence.*

**Supplementary Table 10. Correlations between the NEO personality inventory and academic achievements after time gap regression**

|                          | Scientific Method |             | Behavioural and Social Sciences |             | Basic Biomedical Sciences |             | Clinical Sciences and Skills |             |
|--------------------------|-------------------|-------------|---------------------------------|-------------|---------------------------|-------------|------------------------------|-------------|
|                          | <i>P</i>          | $\beta$     | <i>P</i>                        | $\beta$     | <i>P</i>                  | $\beta$     | <i>P</i>                     | $\beta$     |
| Agreeableness            | 1.80E-01          | 1.34        | 6.42E-01                        | -0.47       | 2.20E-01                  | 1.23        | 2.15E-01                     | 1.24        |
| <b>Conscientiousness</b> | <b>1.55E-04</b>   | <b>3.82</b> | <b>5.19E-04</b>                 | <b>3.50</b> | <b>3.37E-03</b>           | <b>2.95</b> | <b>8.43E-03</b>              | <b>2.65</b> |
| Extraversion             | 4.46E-01          | 0.76        | 3.70E-01                        | 0.90        | 5.14E-01                  | 0.65        | 1.84E-01                     | 1.33        |
| Neuroticism              | 4.41E-01          | 0.77        | 6.53E-01                        | 0.45        | 9.02E-01                  | 0.12        | 3.33E-01                     | 0.97        |
| Openness                 | 1.32E-01          | -1.51       | 8.54E-01                        | -0.18       | 1.96E-01                  | -1.29       | 1.29E-01                     | -1.52       |

*Notes: The  $\beta$  and *P* values were obtained from the linear regression estimate, and the bold represented the significant correlations.*

**Supplementary Table 11. The 95% confidence intervals of indirect effects mediated by brain functional property based on Automatic Anatomical Labeling (AAL) mask**

| Brain area<br>(AAL) | Conscientiousness |                  |                  |                  | Novelty seeking   |                  |                  |                  |
|---------------------|-------------------|------------------|------------------|------------------|-------------------|------------------|------------------|------------------|
|                     | ReHo              | FCD              | FCS              | ALFF             | ReHo              | FCD              | FCS              | ALFF             |
| Precentral_L        | (-0.0006,0.0038)  | (-0.0009,0.0035) | (-0.0017,0.0018) | (-0.0014,0.0015) | (-0.0035,0.0009)  | (-0.0026,0.0019) | (-0.0013,0.0022) | (-0.0013,0.0013) |
| Precentral_R        | (-0.0007,0.0038)  | (-0.0006,0.0037) | (-0.0013,0.003)  | (-0.0008,0.0021) | (-0.004,0.0005)   | (-0.0033,0.0012) | (-0.0019,0.0023) | (-0.0023,0.0006) |
| Frontal_Sup_L       | (-0.004,0.0013)   | (-0.0005,0.0005) | (-0.0016,0.0011) | (-0.0013,0.0026) | (-0.0041,0.0012)  | (-0.002,0.0007)  | (-0.0009,0.0022) | (-0.0036,0.0005) |
| Frontal_Sup_R       | (-0.0033,0.0017)  | (-0.0003,0.0003) | (-0.0016,0.0014) | (-0.001,0.0016)  | (-0.0066,-0.0002) | (-0.0021,0.0011) | (-0.0022,0.0008) | (-0.0036,0.0005) |
| Frontal_Sup_Orb_L   | (-0.0019,0.0009)  | (-0.0007,0.0012) | (-0.0013,0.0005) | (-0.0009,0.0005) | (-0.003,0.0006)   | (-0.0005,0.0008) | (-0.0005,0.0003) | (-0.0005,0.0009) |
| Frontal_Sup_Orb_R   | (-0.002,0.0013)   | (-0.0006,0.0008) | (-0.0008,0.0007) | (-0.0014,0.0006) | (-0.0042,0.0003)  | (-0.0006,0.001)  | (-0.0011,0.0008) | (-0.0014,0.0007) |
| Frontal_Mid_L       | (-0.003,0.0016)   | (-0.0003,0.0003) | (-0.0003,0.0002) | (-0.0009,0.0019) | (-0.0047,0.0004)  | (-0.0018,0.0007) | (-0.0005,0.0009) | (-0.0049,0.0001) |
| Frontal_Mid_R       | (-0.0036,0.0006)  | (-0.0002,0.0002) | (-0.0005,0.0007) | (-0.0009,0.0007) | (-0.0046,0.0002)  | (-0.0024,0.0013) | (-0.0015,0.0013) | (-0.0031,0.0008) |
| Frontal_Mid_Orb_L   | (-0.0028,0.0011)  | (-0.001,0.001)   | (-0.0003,0.0003) | (-0.0021,0.0008) | (-0.0038,0.0006)  | (-0.0003,0.0004) | (-0.0004,0.0006) | (-0.0027,0.001)  |
| Frontal_Mid_Orb_R   | (-0.0009,0.0017)  | (-0.0007,0.0006) | (-0.0013,0.0006) | (-0.0005,0.0012) | (-0.0017,0.0009)  | (-0.0006,0.0006) | (-0.0004,0.0006) | (-0.0009,0.0013) |
| Frontal_Inf_Oper_L  | (-0.0008,0.0005)  | (-0.0007,0.001)  | (-0.0007,0.0015) | (-0.0006,0.0004) | (-0.001,0.0007)   | (-0.0007,0.0021) | (-0.0011,0.0015) | (-0.0019,0.0007) |
| Frontal_Inf_Oper_R  | (-0.0003,0.0002)  | (-0.0004,0.0004) | (-0.0009,0.0005) | (-0.0017,0.001)  | (-0.0007,0.0017)  | (-0.0007,0.0019) | (-0.0006,0.0015) | (-0.0031,0.0005) |
| Frontal_Inf_Tri_L   | (-0.0021,0.0011)  | (-0.0005,0.0003) | (-0.0008,0.002)  | (-0.0008,0.0011) | (-0.0036,0.0004)  | (-0.001,0.0016)  | (-0.0016,0.0022) | (-0.0036,0.0006) |
| Frontal_Inf_Tri_R   | (-0.0028,0.001)   | (-0.0003,0.0003) | (-0.0025,0.0007) | (-0.0017,0.0009) | (-0.0021,0.0006)  | (-0.0012,0.0012) | (-0.0009,0.0022) | (-0.0027,0.0006) |
| Frontal_Inf_Orb_L   | (-0.0006,0.0007)  | (-0.0002,0.0002) | (-0.0006,0.0008) | (-0.0005,0.0004) | (-0.0018,0.0009)  | (-0.0008,0.0012) | (-0.0033,0.0008) | (-0.0008,0.0006) |
| Frontal_Inf_Orb_R   | (-0.001,0.0005)   | (-0.0006,0.0005) | (-0.0014,0.0005) | (-0.0006,0.0007) | (-0.0004,0.0004)  | (-0.0005,0.0009) | (-0.0008,0.0008) | (-0.0007,0.0007) |
| Rolandic_Oper_L     | (-0.0006,0.0005)  | (-0.0005,0.0004) | (-0.001,0.0005)  | (-0.0003,0.0003) | (-0.0006,0.0004)  | (-0.0006,0.0004) | (-0.0006,0.0015) | (-0.0008,0.0014) |
| Rolandic_Oper_R     | (-0.0005,0.0006)  | (-0.0005,0.0008) | (-0.0012,0.0005) | (-0.0013,0.0014) | (-0.0001,0.0001)  | (-0.0007,0.0005) | (-0.0007,0.0018) | (-0.0015,0.0022) |

|                      |                  |                    |                  |                  |                  |                  |                    |                   |
|----------------------|------------------|--------------------|------------------|------------------|------------------|------------------|--------------------|-------------------|
| Supp_Motor_Area_L    | (-0.0014,0.0012) | (-0.0005,0.0004)   | (-0.0006,0.0005) | (-0.0024,0.0011) | (-0.0005,0.0031) | (-0.0005,0.0004) | (-0.0006,0.0005)   | (-0.0018,0.0022)  |
| Supp_Motor_Area_R    | (-0.0005,0.0005) | (-0.0003,0.0004)   | (-0.0004,0.0004) | (-0.0019,0.0005) | (-0.0005,0.0007) | (-0.0004,0.0006) | (-0.0001,0.0001)   | (-0.0007,0.0006)  |
| Olfactory_L          | (-0.0014,0.0006) | (-0.0004,0.0004)   | (-0.0008,0.0007) | (-0.0014,0.0019) | (-0.0008,0.0005) | (-0.0011,0.0013) | (-0.00004,0.00004) | (-0.0021,0.0012)  |
| Olfactory_R          | (-0.0014,0.001)  | (-0.0005,0.0004)   | (-0.001,0.0007)  | (-0.0014,0.0013) | (-0.0017,0.0009) | (-0.001,0.001)   | (-0.0014,0.0006)   | (-0.0013,0.0009)  |
| Frontal_Sup_Medial_L | (-0.0026,0.0019) | (-0.0002,0.0002)   | (-0.0027,0.0008) | (-0.0016,0.0017) | (-0.0043,0.0005) | (-0.0017,0.0011) | (-0.0009,0.0024)   | (-0.0039,0.0003)  |
| Frontal_Sup_Medial_R | (-0.0015,0.002)  | (-0.0004,0.0003)   | (-0.0021,0.0014) | (-0.0011,0.0011) | (-0.0037,0.0006) | (-0.0011,0.0015) | (-0.0014,0.0023)   | (-0.0021,0.0006)  |
| Frontal_Mid_Orb_L    | (-0.0024,0.003)  | (-0.0006,0.0012)   | (-0.0028,0.001)  | (-0.001,0.0006)  | (-0.0054,0.0006) | (-0.002,0.0008)  | (-0.0013,0.0017)   | (-0.0011,0.0007)  |
| Frontal_Mid_Orb_R    | (-0.002,0.0026)  | (-0.0005,0.001)    | (-0.0026,0.0011) | (-0.0019,0.0009) | (-0.0036,0.0012) | (-0.0015,0.001)  | (-0.0009,0.0026)   | (-0.0022,0.0006)  |
| Rectus_L             | (-0.0016,0.0014) | (-0.0007,0.0006)   | (-0.0016,0.0009) | (-0.0014,0.0011) | (-0.0032,0.0005) | (-0.0017,0.0014) | (-0.0014,0.0011)   | (-0.0017,0.0007)  |
| Rectus_R             | (-0.0017,0.0016) | (-0.0008,0.0005)   | (-0.0013,0.0008) | (-0.002,0.0016)  | (-0.0034,0.0005) | (-0.0017,0.0013) | (-0.0013,0.001)    | (-0.0045,0.0002)  |
| Insula_L             | (-0.0006,0.0007) | (-0.0007,0.0009)   | (-0.001,0.0005)  | (-0.0013,0.0013) | (-0.0013,0.0007) | (-0.001,0.0006)  | (-0.001,0.001)     | (-0.0015,0.002)   |
| Insula_R             | (-0.0004,0.0008) | (-0.0007,0.0009)   | (-0.0012,0.0014) | (-0.0017,0.0017) | (-0.0003,0.0003) | (-0.0007,0.0005) | (-0.0006,0.0015)   | (-0.0017,0.0013)  |
| Cingulum_Ant_L       | (-0.0015,0.0008) | (-0.00002,0.00002) | (-0.0017,0.0005) | (-0.0032,0.0016) | (-0.0007,0.0007) | (-0.0006,0.0009) | (-0.0005,0.0008)   | (-0.005,0.0005)   |
| Cingulum_Ant_R       | (-0.0009,0.0008) | (-0.0003,0.0002)   | (-0.0013,0.0006) | (-0.0028,0.0021) | (-0.0004,0.0005) | (-0.0007,0.0015) | (-0.0007,0.0007)   | (-0.0075,-0.0009) |
| Cingulum_Mid_L       | (-0.0011,0.0009) | (-0.0005,0.0004)   | (-0.0005,0.0005) | (-0.0007,0.0018) | (-0.0007,0.0005) | (-0.0007,0.0005) | (-0.0003,0.0005)   | (-0.0026,0.0008)  |
| Cingulum_Mid_R       | (-0.0004,0.0006) | (-0.0005,0.0003)   | (-0.0006,0.0004) | (-0.0014,0.001)  | (-0.0003,0.0003) | (-0.0007,0.0007) | (-0.0008,0.0011)   | (-0.0026,0.0008)  |
| Cingulum_Post_L      | (-0.0011,0.0021) | (-0.0005,0.0013)   | (-0.0017,0.0009) | (-0.001,0.0011)  | (-0.0032,0.0006) | (-0.0027,0.0009) | (-0.0016,0.001)    | (-0.0021,0.0007)  |
| Cingulum_Post_R      | (-0.0014,0.0017) | (-0.0007,0.0013)   | (-0.0015,0.0011) | (-0.0008,0.0022) | (-0.0028,0.0007) | (-0.0024,0.0009) | (-0.0022,0.0009)   | (-0.0028,0.0011)  |
| Hippocampus_L        | (-0.0006,0.0004) | (-0.0011,0.0006)   | (-0.001,0.0014)  | (-0.0005,0.0007) | (-0.0006,0.0005) | (-0.0009,0.0011) | (-0.0002,0.0002)   | (-0.003,0.0007)   |
| Hippocampus_R        | (-0.0008,0.0005) | (-0.0018,0.0006)   | (-0.0007,0.001)  | (-0.0005,0.0006) | (-0.0004,0.0005) | (-0.0013,0.0009) | (-0.0008,0.0005)   | (-0.0013,0.0013)  |
| ParaHippocampal_L    | (-0.0001,0.0001) | (-0.0004,0.0003)   | (-0.0006,0.0017) | (-0.0007,0.0009) | (-0.0011,0.0006) | (-0.0003,0.0003) | (-0.0011,0.0006)   | (-0.0006,0.0013)  |
| ParaHippocampal_R    | (-0.0003,0.0002) | (-0.0007,0.0004)   | (-0.0005,0.0012) | (-0.0012,0.002)  | (-0.0001,0.0001) | (-0.0004,0.0004) | (-0.0011,0.0007)   | (-0.0006,0.0031)  |
| Amygdala_L           | (-0.0002,0.0003) | (-0.0003,0.0003)   | (-0.0005,0.0013) | (-0.0003,0.0003) | (-0.0007,0.001)  | (-0.0004,0.0003) | (-0.0006,0.0011)   | (-0.0018,0.0011)  |
| Amygdala_R           | (-0.0001,0.0001) | (-0.0004,0.0005)   | (-0.0005,0.0005) | (-0.0001,0.0001) | (-0.0006,0.0005) | (-0.0002,0.0002) | (-0.0012,0.0011)   | (-0.0011,0.0005)  |
| Calcarine_L          | (-0.0005,0.0016) | (-0.0005,0.0023)   | (-0.0003,0.0004) | (-0.0012,0.0032) | (-0.0012,0.0011) | (-0.0014,0.0006) | (-0.0005,0.0004)   | (-0.0036,0.0004)  |
| Calcarine_R          | (-0.0006,0.0013) | (-0.0008,0.0017)   | (-0.0005,0.0005) | (-0.0017,0.0021) | (-0.0011,0.0009) | (-0.0015,0.0006) | (-0.0005,0.0005)   | (-0.0031,0.0006)  |

|                      |                  |                  |                  |                  |                  |                  |                  |                   |
|----------------------|------------------|------------------|------------------|------------------|------------------|------------------|------------------|-------------------|
| Cuneus_L             | (-0.0004,0.0008) | (-0.0009,0.0013) | (-0.001,0.0007)  | (-0.002,0.0029)  | (-0.0014,0.0007) | (-0.0013,0.0006) | (-0.0005,0.0008) | (-0.0056,0.0002)  |
| Cuneus_R             | (-0.0006,0.0007) | (-0.0012,0.0015) | (-0.0004,0.0003) | (-0.0026,0.0031) | (-0.001,0.0006)  | (-0.0016,0.0007) | (-0.0003,0.0004) | (-0.0057,0.0005)  |
| Lingual_L            | (-0.0015,0.0017) | (-0.0007,0.002)  | (-0.0001,0.0001) | (-0.002,0.0028)  | (-0.0024,0.0006) | (-0.0012,0.0006) | (-0.0012,0.0007) | (-0.0052,0.00005) |
| Lingual_R            | (-0.002,0.0012)  | (-0.0012,0.0013) | (-0.0003,0.0002) | (-0.0016,0.0025) | (-0.0021,0.0007) | (-0.001,0.0006)  | (-0.0008,0.0006) | (-0.0034,0.0005)  |
| Occipital_Sup_L      | (-0.0008,0.0005) | (-0.0005,0.0009) | (-0.0012,0.0006) | (-0.002,0.0024)  | (-0.0004,0.0004) | (-0.0003,0.0003) | (-0.0002,0.0001) | (-0.0036,0.0012)  |
| Occipital_Sup_R      | (-0.0009,0.0005) | (-0.001,0.0007)  | (-0.0006,0.0004) | (-0.0025,0.0014) | (-0.0005,0.0009) | (-0.0005,0.0004) | (-0.0001,0.0001) | (-0.0026,0.0017)  |
| Occipital_Mid_L      | (-0.0018,0.0006) | (-0.0008,0.0006) | (-0.0008,0.0005) | (-0.0026,0.0019) | (-0.0006,0.001)  | (-0.0006,0.0005) | (-0.0004,0.0004) | (-0.003,0.0016)   |
| Occipital_Mid_R      | (-0.0007,0.0013) | (-0.001,0.0005)  | (-0.0011,0.0006) | (-0.0024,0.0006) | (-0.0007,0.0031) | (-0.0003,0.0002) | (-0.0003,0.0003) | (-0.001,0.0007)   |
| Occipital_Inf_L      | (-0.001,0.0006)  | (-0.0012,0.0011) | (-0.0012,0.0005) | (-0.0028,0.0021) | (-0.0004,0.0006) | (-0.0005,0.0006) | (-0.0012,0.0013) | (-0.0033,0.0017)  |
| Occipital_Inf_R      | (-0.0016,0.0006) | (-0.0012,0.0007) | (-0.0003,0.0003) | (-0.0027,0.0012) | (-0.0008,0.0009) | (-0.0002,0.0002) | (-0.0008,0.0016) | (-0.0017,0.0011)  |
| Fusiform_L           | (-0.0012,0.0016) | (-0.0012,0.0009) | (-0.0005,0.0004) | (-0.0015,0.0019) | (-0.0022,0.0008) | (-0.0005,0.0007) | (-0.0008,0.0007) | (-0.0049,0.00002) |
| Fusiform_R           | (-0.0015,0.0018) | (-0.0018,0.0009) | (-0.0017,0.0008) | (-0.0011,0.0008) | (-0.0021,0.001)  | (-0.0008,0.0009) | (-0.0021,0.0006) | (-0.0023,0.0007)  |
| Postcentral_L        | (-0.0012,0.0031) | (-0.0007,0.0028) | (-0.0013,0.0015) | (-0.0014,0.0022) | (-0.0045,0.0002) | (-0.0028,0.0008) | (-0.0011,0.0017) | (-0.0041,0.0003)  |
| Postcentral_R        | (-0.0009,0.0034) | (-0.0008,0.0025) | (-0.0015,0.0021) | (-0.0008,0.0016) | (-0.0045,0.0004) | (-0.0026,0.0009) | (-0.002,0.0017)  | (-0.0023,0.0006)  |
| Parietal_Sup_L       | (-0.0015,0.0009) | (-0.0009,0.0006) | (-0.0012,0.0012) | (-0.0026,0.0013) | (-0.0027,0.0006) | (-0.0006,0.0015) | (-0.002,0.0008)  | (-0.0028,0.0019)  |
| Parietal_Sup_R       | (-0.001,0.0007)  | (-0.0013,0.0008) | (-0.0012,0.001)  | (-0.0018,0.0012) | (-0.0019,0.0007) | (-0.0006,0.0021) | (-0.0011,0.0012) | (-0.0008,0.0022)  |
| Parietal_Inf_L       | (-0.0002,0.0002) | (-0.0002,0.0002) | (-0.0014,0.0012) | (-0.0002,0.0002) | (-0.0014,0.0009) | (-0.0007,0.0006) | (-0.0014,0.0017) | (-0.0006,0.0008)  |
| Parietal_Inf_R       | (-0.0003,0.0004) | (-0.0007,0.0008) | (-0.0011,0.0006) | (-0.0007,0.0006) | (-0.0005,0.0007) | (-0.0009,0.0019) | (-0.0009,0.0017) | (-0.0019,0.0007)  |
| SupraMarginal_L      | (-0.0002,0.0002) | (-0.0003,0.0004) | (-0.0005,0.0005) | (-0.0005,0.0003) | (-0.0005,0.0006) | (-0.0016,0.001)  | (-0.0006,0.0017) | (-0.0008,0.0005)  |
| SupraMarginal_R      | (-0.0001,0.0002) | (-0.0003,0.0005) | (-0.001,0.0006)  | (-0.0011,0.001)  | (-0.0006,0.001)  | (-0.0016,0.0014) | (-0.0006,0.0027) | (-0.0028,0.0006)  |
| Angular_L            | (-0.0012,0.0012) | (-0.0003,0.0004) | (-0.0013,0.0012) | (-0.0005,0.0004) | (-0.0016,0.0011) | (-0.0014,0.0006) | (-0.0009,0.0011) | (-0.0004,0.0005)  |
| Angular_R            | (-0.0013,0.001)  | (-0.0004,0.0006) | (-0.001,0.0009)  | (-0.0008,0.0014) | (-0.0009,0.0015) | (-0.002,0.0006)  | (-0.0007,0.0008) | (-0.0026,0.0006)  |
| Precuneus_L          | (-0.0004,0.003)  | (-0.0008,0.0008) | (-0.0005,0.001)  | (-0.0014,0.0005) | (-0.0015,0.0012) | (-0.0016,0.0016) | (-0.0006,0.0007) | (-0.0008,0.0015)  |
| Precuneus_R          | (-0.0012,0.0027) | (-0.0007,0.0007) | (-0.0009,0.0013) | (-0.0008,0.0005) | (-0.002,0.0018)  | (-0.0015,0.0012) | (-0.0016,0.001)  | (-0.0006,0.0012)  |
| Paracentral_Lobule_L | (-0.0007,0.0016) | (-0.0013,0.0017) | (-0.0015,0.0024) | (-0.0008,0.001)  | (-0.0026,0.0006) | (-0.0032,0.0008) | (-0.0042,0.0004) | (-0.0016,0.001)   |
| Paracentral_Lobule_R | (-0.0007,0.0019) | (-0.0011,0.0019) | (-0.0012,0.0024) | (-0.0008,0.0014) | (-0.0032,0.0005) | (-0.0031,0.0006) | (-0.004,0.0003)  | (-0.0022,0.0006)  |

|                     |                  |                  |                  |                  |                  |                  |                  |                  |
|---------------------|------------------|------------------|------------------|------------------|------------------|------------------|------------------|------------------|
| Caudate_L           | (-0.0007,0.0018) | (-0.0008,0.0007) | (-0.0012,0.0005) | (-0.0006,0.0012) | (-0.0013,0.001)  | (-0.001,0.0008)  | (-0.0008,0.0005) | (-0.0013,0.0012) |
| Caudate_R           | (-0.0012,0.0015) | (-0.0006,0.001)  | (-0.001,0.0006)  | (-0.0005,0.0009) | (-0.0015,0.0015) | (-0.0009,0.0011) | (-0.0016,0.0006) | (-0.0008,0.0007) |
| Putamen_L           | (-0.0005,0.0008) | (-0.0014,0.0008) | (-0.0003,0.0004) | (-0.0005,0.0007) | (-0.0011,0.0006) | (-0.001,0.0012)  | (-0.0005,0.0007) | (-0.0006,0.0016) |
| Putamen_R           | (-0.0013,0.001)  | (-0.0013,0.0007) | (-0.0002,0.0002) | (-0.0007,0.0004) | (-0.0018,0.0007) | (-0.001,0.0012)  | (-0.0008,0.001)  | (-0.0016,0.0006) |
| Pallidum_L          | (-0.0004,0.0007) | (-0.0013,0.0007) | (-0.0012,0.0005) | (-0.0002,0.0002) | (-0.0002,0.0003) | (-0.0016,0.0009) | (-0.0005,0.0004) | (-0.0009,0.0014) |
| Pallidum_R          | (-0.0017,0.0016) | (-0.0007,0.0006) | (-0.0007,0.0005) | (-0.0011,0.0006) | (-0.0016,0.0019) | (-0.0011,0.0006) | (-0.001,0.0006)  | (-0.0017,0.0006) |
| Thalamus_L          | (-0.0002,0.0002) | (-0.0008,0.001)  | (-0.0008,0.0005) | (-0.0007,0.0009) | (-0.0005,0.001)  | (-0.0012,0.0006) | (-0.0016,0.001)  | (-0.0011,0.0006) |
| Thalamus_R          | (-0.0002,0.0002) | (-0.001,0.0012)  | (-0.0009,0.0005) | (-0.0011,0.0009) | (-0.0006,0.0009) | (-0.0016,0.0008) | (-0.0017,0.0012) | (-0.0024,0.0006) |
| Heschl_L            | (-0.0007,0.0006) | (-0.0001,0.0001) | (-0.0011,0.0005) | (-0.0006,0.0004) | (-0.0005,0.0004) | (-0.0004,0.0003) | (-0.0006,0.0015) | (-0.0005,0.0005) |
| Heschl_R            | (-0.002,0.0005)  | (-0.001,0.0006)  | (-0.0017,0.0007) | (-0.0006,0.0005) | (-0.0019,0.0009) | (-0.0002,0.0002) | (-0.0006,0.003)  | (-0.0005,0.0007) |
| Temporal_Sup_L      | (-0.0012,0.0009) | (-0.0004,0.0004) | (-0.0016,0.0006) | (-0.0005,0.0003) | (-0.0012,0.0012) | (-0.0007,0.0005) | (-0.0006,0.0018) | (-0.0006,0.0008) |
| Temporal_Sup_R      | (-0.0008,0.0006) | (-0.0013,0.0006) | (-0.0027,0.0004) | (-0.0012,0.0009) | (-0.0015,0.0012) | (-0.0005,0.0009) | (-0.0008,0.0018) | (-0.0015,0.0009) |
| Temporal_Pole_Sup_L | (-0.0007,0.0004) | (-0.0005,0.001)  | (-0.0004,0.0004) | (-0.0016,0.0015) | (-0.0004,0.0006) | (-0.0012,0.0007) | (-0.0025,0.0007) | (-0.0016,0.0013) |
| Temporal_Pole_Sup_R | (-0.0003,0.0004) | (-0.0005,0.0012) | (-0.0005,0.0016) | (-0.0017,0.0011) | (-0.0008,0.0005) | (-0.0011,0.0006) | (-0.0005,0.0004) | (-0.0026,0.0007) |
| Temporal_Mid_L      | (-0.0006,0.0004) | (-0.0012,0.0005) | (-0.0005,0.0009) | (-0.0004,0.0003) | (-0.001,0.0007)  | (-0.0008,0.0017) | (-0.0007,0.001)  | (-0.0011,0.0006) |
| Temporal_Mid_R      | (-0.0005,0.001)  | (-0.0015,0.0005) | (-0.0005,0.0007) | (-0.0005,0.0011) | (-0.0013,0.0007) | (-0.0007,0.0016) | (-0.0009,0.0015) | (-0.0028,0.0006) |
| Temporal_Pole_Mid_L | (-0.0009,0.0005) | (-0.0004,0.0005) | (-0.0005,0.0004) | (-0.0005,0.0011) | (-0.0008,0.0005) | (-0.0009,0.0009) | (-0.001,0.0008)  | (-0.0009,0.0011) |
| Temporal_Pole_Mid_R | (-0.0006,0.001)  | (-0.0008,0.0009) | (-0.001,0.0013)  | (-0.0006,0.0021) | (-0.0017,0.0007) | (-0.0006,0.0007) | (-0.001,0.0015)  | (-0.0013,0.0013) |
| Temporal_Inf_L      | (-0.0008,0.0005) | (-0.0003,0.0003) | (-0.0006,0.0015) | (-0.0003,0.0003) | (-0.0008,0.0007) | (-0.0008,0.0012) | (-0.0027,0.0006) | (-0.0004,0.0004) |
| Temporal_Inf_R      | (-0.001,0.0006)  | (-0.0006,0.0005) | (-0.0004,0.0003) | (-0.0006,0.0009) | (-0.0014,0.0006) | (-0.0008,0.0015) | (-0.001,0.0012)  | (-0.0017,0.0006) |

*Abbreviations: AAL, Automatic Anatomical Labeling; ReHo, Regional Homogeneity; ALFF, Amplitude of Low Frequency Fluctuation; FCD, Functional Connectivity*

*Density; FCS, Functional Connectivity Strength.*



**Supplementary Table 12. The 95% confidence intervals of indirect effects mediated by personality based on Automatic Anatomical Labeling (AAL) mask**

| Brain area<br>(AAL) | Conscientiousness |                    |                  |                  | Novelty seeking  |                    |                  |                  |
|---------------------|-------------------|--------------------|------------------|------------------|------------------|--------------------|------------------|------------------|
|                     | ReHo              | FCD                | FCS              | ALFF             | ReHo             | FCD                | FCS              | ALFF             |
| Precentral_L        | (-0.1235,0.022)   | (-0.00025,0.00007) | (-0.0547,0.0519) | (-0.0804,0.0782) | (-0.1119,0.0358) | (-0.00006,0.0001)  | (-0.0487,0.0146) | (-0.1674,0.0423) |
| Precentral_R        | (-0.0944,0.0202)  | (-0.00025,0.00005) | (-0.0666,0.0288) | (-0.0933,0.0344) | (-0.0726,0.0203) | (-0.00005,0.0001)  | (-0.065,0.0188)  | (-0.0426,0.0196) |
| Frontal_Sup_L       | (-0.1024,0.0345)  | (-0.0001,0.00011)  | (-0.0621,0.0427) | (-0.0376,0.0742) | (-0.0254,0.0776) | (-0.00003,0.00016) | (-0.0178,0.0291) | (-0.0167,0.0362) |
| Frontal_Sup_R       | (-0.1051,0.0528)  | (-0.00008,0.00013) | (-0.0624,0.0562) | (-0.0416,0.0677) | (-0.0439,0.1054) | (-0.00004,0.0002)  | (-0.0161,0.0539) | (-0.0151,0.0417) |
| Frontal_Sup_Orb_L   | (-0.0529,0.0238)  | (-0.00029,0.00005) | (-0.0696,0.0239) | (-0.0673,0.024)  | (-0.0205,0.0705) | (-0.00003,0.00045) | (-0.0119,0.04)   | (-0.0174,0.0974) |
| Frontal_Sup_Orb_R   | (-0.0464,0.0298)  | (-0.00025,0.00007) | (-0.0465,0.0421) | (-0.0652,0.0221) | (-0.02,0.063)    | (-0.00004,0.00037) | (-0.0128,0.0556) | (-0.0187,0.0833) |
| Frontal_Mid_L       | (-0.087,0.0467)   | (-0.00011,0.00011) | (-0.0443,0.0626) | (-0.0366,0.0771) | (-0.0266,0.0844) | (-0.00003,0.00014) | (-0.0152,0.0478) | (-0.0175,0.0349) |
| Frontal_Mid_R       | (-0.131,0.0207)   | (-0.00011,0.00011) | (-0.0275,0.078)  | (-0.0563,0.0441) | (-0.0191,0.0684) | (-0.00003,0.00015) | (-0.0141,0.0466) | (-0.0135,0.0419) |
| Frontal_Mid_Orb_L   | (-0.0514,0.0199)  | (-0.00027,0.00003) | (-0.0422,0.0354) | (-0.0475,0.0172) | (-0.0157,0.0514) | (-0.00004,0.00038) | (-0.0146,0.0201) | (-0.0113,0.0419) |
| Frontal_Mid_Orb_R   | (-0.0234,0.043)   | (-0.00011,0.00013) | (-0.012,0.0789)  | (-0.0142,0.039)  | (-0.0149,0.0609) | (-0.00002,0.00038) | (-0.015,0.0198)  | (-0.0098,0.0444) |
| Frontal_Inf_Oper_L  | (-0.0775,0.0424)  | (-0.00014,0.0001)  | (-0.0602,0.0271) | (-0.0706,0.0414) | (-0.0614,0.0153) | (-0.00004,0.00009) | (-0.0416,0.0118) | (-0.0313,0.02)   |
| Frontal_Inf_Oper_R  | (-0.0658,0.055)   | (-0.00011,0.00012) | (-0.0249,0.0713) | (-0.0663,0.0412) | (-0.0277,0.0243) | (-0.00003,0.00018) | (-0.0391,0.0123) | (-0.0159,0.0316) |
| Frontal_Inf_Tri_L   | (-0.0791,0.0433)  | (-0.00009,0.00014) | (-0.0647,0.0267) | (-0.0476,0.0659) | (-0.0229,0.028)  | (-0.00003,0.00013) | (-0.0377,0.0124) | (-0.0158,0.0497) |
| Frontal_Inf_Tri_R   | (-0.0939,0.035)   | (-0.0001,0.00017)  | (-0.0251,0.0915) | (-0.0782,0.0431) | (-0.0363,0.0213) | (-0.00004,0.00017) | (-0.0393,0.0144) | (-0.0161,0.0567) |
| Frontal_Inf_Orb_L   | (-0.0431,0.0499)  | (-0.00016,0.00015) | (-0.0577,0.0377) | (-0.0614,0.0563) | (-0.0129,0.0438) | (-0.00004,0.00039) | (-0.0258,0.0164) | (-0.0194,0.0993) |
| Frontal_Inf_Orb_R   | (-0.0673,0.0318)  | (-0.00014,0.00014) | (-0.0208,0.0907) | (-0.0518,0.0574) | (-0.0156,0.0319) | (-0.00003,0.00042) | (-0.0224,0.0218) | (-0.0218,0.1153) |
| Rolandic_Oper_L     | (-0.0295,0.078)   | (-0.00006,0.00013) | (-0.0257,0.0498) | (-0.0674,0.0486) | (-0.1308,0.0122) | (-0.00003,0.00006) | (-0.0338,0.0097) | (-0.0526,0.0158) |
| Rolandic_Oper_R     | (-0.0279,0.0725)  | (-0.00005,0.00014) | (-0.0178,0.0573) | (-0.0508,0.0543) | (-0.0738,0.0128) | (-0.00003,0.00007) | (-0.0395,0.0095) | (-0.0246,0.0226) |

|                      |                  |                    |                  |                  |                  |                    |                  |                   |
|----------------------|------------------|--------------------|------------------|------------------|------------------|--------------------|------------------|-------------------|
| Supp_Motor_Area_L    | (-0.0617,0.0547) | (-0.00023,0.0001)  | (-0.0799,0.0262) | (-0.0852,0.0369) | (-0.0333,0.0215) | (-0.00004,0.00013) | (-0.0173,0.0293) | (-0.0368,0.0199)  |
| Supp_Motor_Area_R    | (-0.06,0.0592)   | (-0.00014,0.00012) | (-0.0706,0.0338) | (-0.1398,0.0161) | (-0.0349,0.021)  | (-0.00004,0.00011) | (-0.0155,0.0357) | (-0.0876,0.0158)  |
| Olfactory_L          | (-0.0781,0.016)  | (-0.00015,0.00015) | (-0.0646,0.0139) | (-0.0385,0.0509) | (-0.0139,0.0809) | (-0.00004,0.00025) | (-0.011,0.0266)  | (-0.0251,0.0864)  |
| Olfactory_R          | (-0.0508,0.0362) | (-0.00019,0.00013) | (-0.0431,0.0291) | (-0.0507,0.0486) | (-0.0237,0.0908) | (-0.00004,0.00021) | (-0.01,0.033)    | (-0.0184,0.0822)  |
| Frontal_Sup_Medial_L | (-0.0594,0.0445) | (-0.00007,0.00007) | (-0.0588,0.017)  | (-0.042,0.0432)  | (-0.0295,0.0845) | (-0.00002,0.00012) | (-0.0097,0.0245) | (-0.0183,0.0659)  |
| Frontal_Sup_Medial_R | (-0.0428,0.0547) | (-0.00005,0.00008) | (-0.0433,0.0288) | (-0.0425,0.0405) | (-0.0295,0.0869) | (-0.00002,0.00012) | (-0.0099,0.0234) | (-0.0158,0.0723)  |
| Frontal_Mid_Orb_L    | (-0.0244,0.0301) | (-0.00004,0.00009) | (-0.0437,0.0155) | (-0.0268,0.0149) | (-0.0298,0.0508) | (-0.00003,0.00014) | (-0.0075,0.0199) | (-0.0054,0.0212)  |
| Frontal_Mid_Orb_R    | (-0.0257,0.0336) | (-0.00004,0.00011) | (-0.0458,0.0198) | (-0.039,0.019)   | (-0.0245,0.057)  | (-0.00003,0.00016) | (-0.0097,0.0181) | (-0.0096,0.0423)  |
| Rectus_L             | (-0.0364,0.0309) | (-0.00016,0.00013) | (-0.0501,0.0264) | (-0.0354,0.0288) | (-0.0242,0.0785) | (-0.00005,0.00037) | (-0.0099,0.0333) | (-0.0167,0.0714)  |
| Rectus_R             | (-0.0373,0.0344) | (-0.00018,0.00011) | (-0.0467,0.029)  | (-0.0467,0.0375) | (-0.0249,0.0737) | (-0.00005,0.00033) | (-0.0103,0.0396) | (-0.0353,0.0899)  |
| Insula_L             | (-0.03,0.1046)   | (-0.00004,0.00019) | (-0.0231,0.0652) | (-0.0601,0.0577) | (-0.1248,0.0141) | (-0.00003,0.00008) | (-0.0416,0.011)  | (-0.0157,0.0506)  |
| Insula_R             | (-0.0388,0.0792) | (-0.00003,0.00016) | (-0.0033,0.0974) | (-0.0455,0.0454) | (-0.0584,0.0156) | (-0.00002,0.0001)  | (-0.0257,0.0118) | (-0.0135,0.0301)  |
| Cingulum_Ant_L       | (-0.0738,0.0374) | (-0.0001,0.00011)  | (-0.0561,0.0128) | (-0.0575,0.0292) | (-0.015,0.0727)  | (-0.00003,0.00017) | (-0.0084,0.0386) | (-0.0112,0.0357)  |
| Cingulum_Ant_R       | (-0.0651,0.0557) | (-0.0001,0.00011)  | (-0.0475,0.0194) | (-0.0606,0.0444) | (-0.0158,0.0756) | (-0.00002,0.00017) | (-0.0092,0.0429) | (-0.0144,0.0331)  |
| Cingulum_Mid_L       | (-0.0171,0.1359) | (-0.00008,0.00016) | (-0.0651,0.024)  | (-0.0381,0.1031) | (-0.171,0.0245)  | (-0.00004,0.00008) | (-0.0108,0.0579) | (-0.2197,-0.0047) |
| Cingulum_Mid_R       | (-0.0413,0.1016) | (-0.00008,0.00012) | (-0.0658,0.0254) | (-0.0968,0.0696) | (-0.1348,0.0174) | (-0.00003,0.0001)  | (-0.0113,0.0678) | (-0.2244,0.0002)  |
| Cingulum_Post_L      | (-0.0285,0.0529) | (-0.00002,0.00008) | (-0.0398,0.0213) | (-0.0393,0.043)  | (-0.0139,0.024)  | (-0.00001,0.00006) | (-0.0085,0.0344) | (-0.0457,0.0107)  |
| Cingulum_Post_R      | (-0.0393,0.0459) | (-0.00002,0.00014) | (-0.0429,0.0328) | (-0.026,0.0688)  | (-0.0269,0.0152) | (-0.00002,0.00009) | (-0.0108,0.0415) | (-0.0461,0.0132)  |
| Hippocampus_L        | (-0.0587,0.0907) | (-0.00019,0.00034) | (-0.1116,0.0073) | (-0.0972,0.0711) | (-0.1063,0.0213) | (-0.00005,0.00046) | (-0.0413,0.0141) | (-0.0482,0.0293)  |
| Hippocampus_R        | (-0.0391,0.099)  | (-0.00009,0.00037) | (-0.0591,0.0401) | (-0.0533,0.1466) | (-0.1579,0.0233) | (-0.00005,0.00035) | (-0.0831,0.0154) | (-0.0259,0.098)   |
| ParaHippocampal_L    | (-0.0677,0.0625) | (-0.00014,0.00026) | (-0.0947,0.0126) | (-0.0397,0.0497) | (-0.0154,0.1008) | (-0.00005,0.00035) | (-0.0211,0.0219) | (-0.0124,0.0634)  |
| ParaHippocampal_R    | (-0.0731,0.0625) | (-0.0001,0.00023)  | (-0.0717,0.0279) | (-0.038,0.0626)  | (-0.0234,0.0416) | (-0.00004,0.00027) | (-0.056,0.0127)  | (-0.0249,0.0978)  |
| Amygdala_L           | (-0.0484,0.0392) | (-0.00016,0.00019) | (-0.0499,0.0149) | (-0.0428,0.0224) | (-0.0138,0.0305) | (-0.00007,0.00009) | (-0.0138,0.0131) | (-0.0079,0.0464)  |
| Amygdala_R           | (-0.0454,0.0434) | (-0.00009,0.00021) | (-0.0495,0.0185) | (-0.0431,0.0327) | (-0.0117,0.0451) | (-0.00004,0.00025) | (-0.0129,0.0154) | (-0.0096,0.0479)  |
| Calcarine_L          | (-0.06,0.0113)   | (-0.00011,0.00002) | (-0.0348,0.0304) | (-0.0288,0.0108) | (-0.0306,0.0089) | (-0.00002,0.00006) | (-0.0221,0.0103) | (-0.054,0.0241)   |
| Calcarine_R          | (-0.0401,0.0191) | (-0.00008,0.00004) | (-0.0497,0.0176) | (-0.0247,0.0197) | (-0.0372,0.0079) | (-0.00001,0.00006) | (-0.0315,0.0085) | (-0.0477,0.0151)  |

|                      |                  |                    |                  |                  |                  |                    |                  |                  |
|----------------------|------------------|--------------------|------------------|------------------|------------------|--------------------|------------------|------------------|
| Cuneus_L             | (-0.0512,0.0263) | (-0.00006,0.00004) | (-0.0125,0.062)  | (-0.0253,0.0177) | (-0.0388,0.0105) | (-0.00002,0.00004) | (-0.0318,0.0089) | (-0.0512,0.0477) |
| Cuneus_R             | (-0.0389,0.036)  | (-0.00006,0.00005) | (-0.0261,0.039)  | (-0.0264,0.0224) | (-0.0378,0.0103) | (-0.00002,0.00004) | (-0.0349,0.0083) | (-0.05,0.039)    |
| Lingual_L            | (-0.0326,0.0287) | (-0.00009,0.00003) | (-0.0346,0.0378) | (-0.031,0.0219)  | (-0.0497,0.0113) | (-0.00002,0.00006) | (-0.0331,0.0099) | (-0.0642,0.0382) |
| Lingual_R            | (-0.025,0.0426)  | (-0.00006,0.00006) | (-0.0405,0.031)  | (-0.0388,0.0249) | (-0.0613,0.0129) | (-0.00002,0.00005) | (-0.0395,0.009)  | (-0.045,0.0114)  |
| Occipital_Sup_L      | (-0.0372,0.0576) | (-0.0001,0.00006)  | (-0.0251,0.0636) | (-0.0219,0.0182) | (-0.0485,0.0123) | (-0.00002,0.00007) | (-0.0548,0.0106) | (-0.054,0.0433)  |
| Occipital_Sup_R      | (-0.0235,0.0799) | (-0.00006,0.00009) | (-0.0363,0.0496) | (-0.0247,0.0434) | (-0.0331,0.015)  | (-0.00002,0.0001)  | (-0.08,0.0119)   | (-0.0755,0.0364) |
| Occipital_Mid_L      | (-0.0126,0.1248) | (-0.00008,0.00012) | (-0.0299,0.0765) | (-0.0236,0.0323) | (-0.0474,0.0165) | (-0.00003,0.00015) | (-0.0521,0.0135) | (-0.0741,0.0587) |
| Occipital_Mid_R      | (-0.0137,0.1016) | (-0.00005,0.00012) | (-0.0188,0.086)  | (-0.0152,0.078)  | (-0.015,0.0581)  | (-0.00003,0.00021) | (-0.0511,0.0119) | (-0.0636,0.0134) |
| Occipital_Inf_L      | (-0.0288,0.0445) | (-0.00009,0.0001)  | (-0.063,0.0182)  | (-0.0254,0.0336) | (-0.0207,0.013)  | (-0.00002,0.00014) | (-0.0445,0.0093) | (-0.06,0.0321)   |
| Occipital_Inf_R      | (-0.015,0.0557)  | (-0.00006,0.00011) | (-0.0275,0.0364) | (-0.0202,0.0463) | (-0.0176,0.0119) | (-0.00002,0.0001)  | (-0.0193,0.0115) | (-0.0168,0.0115) |
| Fusiform_L           | (-0.0857,0.0614) | (-0.00014,0.00019) | (-0.0508,0.0566) | (-0.1,0.0783)    | (-0.0206,0.0764) | (-0.00004,0.00032) | (-0.0227,0.0266) | (-0.0487,0.0301) |
| Fusiform_R           | (-0.0766,0.0649) | (-0.00009,0.00019) | (-0.0353,0.0735) | (-0.0688,0.0978) | (-0.0391,0.0249) | (-0.00003,0.00019) | (-0.0522,0.0142) | (-0.0051,0.2501) |
| Postcentral_L        | (-0.0612,0.0234) | (-0.00018,0.00005) | (-0.0392,0.0336) | (-0.0732,0.0469) | (-0.0704,0.022)  | (-0.00007,0.00004) | (-0.0391,0.0102) | (-0.1064,0.0327) |
| Postcentral_R        | (-0.0654,0.0183) | (-0.00016,0.00005) | (-0.0428,0.0311) | (-0.0742,0.0378) | (-0.0523,0.0153) | (-0.00004,0.00008) | (-0.0537,0.0149) | (-0.0348,0.0182) |
| Parietal_Sup_L       | (-0.0415,0.0686) | (-0.00009,0.00013) | (-0.0454,0.0446) | (-0.0243,0.0491) | (-0.0621,0.0158) | (-0.00003,0.00009) | (-0.0446,0.0124) | (-0.0822,0.0468) |
| Parietal_Sup_R       | (-0.0458,0.0712) | (-0.00008,0.00013) | (-0.0402,0.0486) | (-0.0362,0.0548) | (-0.0199,0.0363) | (-0.00003,0.00013) | (-0.067,0.0151)  | (-0.0523,0.013)  |
| Parietal_Inf_L       | (-0.0754,0.0558) | (-0.0001,0.00007)  | (-0.0387,0.0456) | (-0.0625,0.0436) | (-0.0499,0.0181) | (-0.00002,0.00011) | (-0.0205,0.0158) | (-0.126,0.0141)  |
| Parietal_Inf_R       | (-0.0668,0.043)  | (-0.00008,0.00007) | (-0.0255,0.051)  | (-0.0489,0.0411) | (-0.0134,0.0682) | (-0.00002,0.00014) | (-0.0423,0.0105) | (-0.0147,0.0246) |
| SupraMarginal_L      | (-0.0596,0.0394) | (-0.00005,0.0001)  | (-0.0427,0.0376) | (-0.0583,0.041)  | (-0.0362,0.0148) | (-0.00002,0.00006) | (-0.015,0.0212)  | (-0.03,0.0176)   |
| SupraMarginal_R      | (-0.0445,0.0559) | (-0.00005,0.00009) | (-0.0285,0.05)   | (-0.048,0.0432)  | (-0.0134,0.0491) | (-0.00002,0.00009) | (-0.029,0.0109)  | (-0.0125,0.0368) |
| Angular_L            | (-0.046,0.045)   | (-0.00003,0.00006) | (-0.0295,0.0271) | (-0.0232,0.0498) | (-0.0126,0.0417) | (-0.00002,0.00009) | (-0.0106,0.0145) | (-0.069,0.01)    |
| Angular_R            | (-0.0539,0.0437) | (-0.00004,0.00008) | (-0.0371,0.0333) | (-0.0281,0.0508) | (-0.0165,0.073)  | (-0.00002,0.00011) | (-0.0285,0.0106) | (-0.0113,0.0288) |
| Precuneus_L          | (-0.015,0.1291)  | (-0.00003,0.00014) | (-0.0256,0.0657) | (-0.0222,0.0681) | (-0.0304,0.0281) | (-0.00002,0.00007) | (-0.019,0.0206)  | (-0.1203,0.0291) |
| Precuneus_R          | (-0.0387,0.0844) | (-0.00003,0.00012) | (-0.032,0.0472)  | (-0.0341,0.0656) | (-0.0166,0.0514) | (-0.00002,0.00008) | (-0.0152,0.0199) | (-0.1042,0.0191) |
| Paracentral_Lobule_L | (-0.0509,0.0211) | (-0.00013,0.0001)  | (-0.0451,0.0278) | (-0.0632,0.0465) | (-0.0508,0.0124) | (-0.00008,0.00003) | (-0.0512,0.0147) | (-0.0932,0.0223) |
| Paracentral_Lobule_R | (-0.0474,0.0169) | (-0.00012,0.00007) | (-0.0423,0.0216) | (-0.0556,0.0333) | (-0.0414,0.0103) | (-0.00007,0.00003) | (-0.0491,0.0139) | (-0.0412,0.0125) |

|                     |                  |                    |                  |                  |                  |                    |                  |                  |
|---------------------|------------------|--------------------|------------------|------------------|------------------|--------------------|------------------|------------------|
| Caudate_L           | (-0.0288,0.0788) | (-0.00025,0.0003)  | (-0.081,0.0206)  | (-0.0431,0.0941) | (-0.0876,0.0107) | (-0.00006,0.00056) | (-0.012,0.0471)  | (-0.0244,0.1049) |
| Caudate_R           | (-0.0464,0.0608) | (-0.00038,0.00021) | (-0.0633,0.0325) | (-0.0427,0.1224) | (-0.0723,0.0121) | (-0.00009,0.00029) | (-0.0128,0.055)  | (-0.0714,0.0233) |
| Putamen_L           | (-0.0396,0.066)  | (-0.00018,0.00033) | (-0.0562,0.0317) | (-0.0757,0.1122) | (-0.0508,0.0145) | (-0.00006,0.00039) | (-0.0188,0.0182) | (-0.03,0.1455)   |
| Putamen_R           | (-0.0643,0.0461) | (-0.00015,0.00027) | (-0.0403,0.0451) | (-0.0738,0.14)   | (-0.0267,0.0224) | (-0.00003,0.00049) | (-0.0134,0.0261) | (-0.0515,0.0438) |
| Pallidum_L          | (-0.0342,0.087)  | (-0.00028,0.0005)  | (-0.114,0.0305)  | (-0.0649,0.0933) | (-0.071,0.0148)  | (-0.00008,0.00069) | (-0.0184,0.0504) | (-0.0221,0.1254) |
| Pallidum_R          | (-0.0593,0.0548) | (-0.00027,0.00033) | (-0.073,0.0474)  | (-0.0458,0.1029) | (-0.0187,0.0334) | (-0.00006,0.0007)  | (-0.0193,0.035)  | (-0.0197,0.0818) |
| Thalamus_L          | (-0.0507,0.038)  | (-0.00041,0.00034) | (-0.0847,0.0375) | (-0.0921,0.0648) | (-0.0855,0.0105) | (-0.00016,0.00019) | (-0.0171,0.0905) | (-0.1479,0.0276) |
| Thalamus_R          | (-0.0363,0.0464) | (-0.00032,0.00027) | (-0.0764,0.023)  | (-0.071,0.0894)  | (-0.0964,0.0109) | (-0.00031,0.00009) | (-0.0126,0.064)  | (-0.1732,0.0416) |
| Heschl_L            | (-0.0343,0.0419) | (-0.00006,0.00008) | (-0.0164,0.0383) | (-0.0438,0.0185) | (-0.0844,0.014)  | (-0.00004,0.00003) | (-0.0167,0.008)  | (-0.0253,0.0084) |
| Heschl_R            | (-0.0142,0.067)  | (-0.00003,0.00013) | (-0.0153,0.0398) | (-0.0136,0.0405) | (-0.0656,0.0169) | (-0.00003,0.00003) | (-0.0129,0.0095) | (-0.0171,0.0086) |
| Temporal_Sup_L      | (-0.0483,0.066)  | (-0.00007,0.00013) | (-0.0182,0.061)  | (-0.0526,0.0358) | (-0.0804,0.0187) | (-0.00003,0.00008) | (-0.0203,0.0118) | (-0.0154,0.0253) |
| Temporal_Sup_R      | (-0.0491,0.0619) | (-0.00004,0.0002)  | (-0.0091,0.0947) | (-0.0581,0.042)  | (-0.0307,0.0198) | (-0.00003,0.00015) | (-0.0387,0.0114) | (-0.0151,0.0638) |
| Temporal_Pole_Sup_L | (-0.0416,0.0932) | (-0.00008,0.00024) | (-0.0467,0.0571) | (-0.0349,0.0335) | (-0.0174,0.0715) | (-0.00004,0.00018) | (-0.0339,0.0158) | (-0.0101,0.04)   |
| Temporal_Pole_Sup_R | (-0.0507,0.0851) | (-0.00006,0.00024) | (-0.0181,0.0923) | (-0.0459,0.0292) | (-0.0186,0.0668) | (-0.00005,0.00026) | (-0.0676,0.0126) | (-0.0162,0.0634) |
| Temporal_Mid_L      | (-0.046,0.1029)  | (-0.00006,0.00017) | (-0.032,0.0735)  | (-0.0932,0.0675) | (-0.028,0.1853)  | (-0.00003,0.00029) | (-0.0158,0.0357) | (-0.0396,0.1945) |
| Temporal_Mid_R      | (-0.0419,0.0994) | (-0.00004,0.00018) | (-0.0314,0.0867) | (-0.0354,0.0931) | (-0.0646,0.2428) | (-0.00002,0.00037) | (-0.0294,0.0216) | (-0.0992,0.2395) |
| Temporal_Pole_Mid_L | (-0.0817,0.0406) | (-0.00016,0.00033) | (-0.0727,0.0333) | (-0.0521,0.1244) | (-0.0205,0.1246) | (-0.00008,0.00062) | (-0.0398,0.0151) | (-0.0817,0.2979) |
| Temporal_Pole_Mid_R | (-0.0478,0.0782) | (-0.00007,0.00038) | (-0.0486,0.0644) | (-0.0475,0.1661) | (-0.024,0.125)   | (-0.00007,0.00056) | (-0.0458,0.0172) | (-0.1053,0.3112) |
| Temporal_Inf_L      | (-0.0763,0.0353) | (-0.0002,0.00022)  | (-0.0831,0.0275) | (-0.074,0.0826)  | (-0.1094,0.4036) | (-0.00003,0.00126) | (0.0111,0.2303)  | (-0.0735,0.8069) |
| Temporal_Inf_R      | (-0.0699,0.0437) | (-0.00013,0.00017) | (-0.0703,0.0449) | (-0.0578,0.0821) | (-0.2302,0.5242) | (0.00005,0.00117)  | (-0.0147,0.3179) | (-0.0286,0.0933) |

*Abbreviations: AAL, Automatic Anatomical Labeling; ReHo, Regional Homogeneity; ALFF, Amplitude of Low Frequency Fluctuation; FCD, Functional Connectivity*

*Density; FCS, Functional Connectivity Strength.*
